# Supplementary material for: Cinchona alkaloid and di-tert-butyldicarbonate–DMAP promoted efficient synthesis of (E)-nitroolefins
Source: Royal Society of Chemistry journal article supplement (doi:10.1039/c6ra06644e), 2016-01-01

## SUPPORTING INFORMATION

### **Cinchona alkaloid and di-tert-butylidicarbonate-DMAP promoted efficient synthesis of (E)-nitroolefins**

Nataraj Poomathi<sup>a</sup> and Paramasivan T. Perumal<sup>a\*</sup>

Organic Chemistry Division, CSIR-Central Leather Research Institute, Adyar, Chennai-6000 20, India.  
Fax: +91-44-24911589; E-mail: [ptperumal@gmail.com](mailto:ptperumal@gmail.com)

## TABLE OF CONTENTS

|     |                                                           |         |
|-----|-----------------------------------------------------------|---------|
| I.  | Experimental general.....                                 | S2-S11  |
| II. | Copy of $^1\text{H}$ and $^{13}\text{C}$ NMR spectra..... | S12-S33 |

## Experimental General:

All chemicals were purchased from Sigma Aldrich. All melting points are uncorrected.  $^1\text{H}$  and  $^{13}\text{C}$  NMR spectra were recorded in  $\text{DMSO-}d_6$  using TMS as an internal standard on a Bruker avance spectrometer at 400 MHz and 100 MHz respectively. Mass spectra were recorded using a JEOL GCMate-II – HR mass spectrometer. Analytical TLC was performed on precoated aluminium sheets of silica gel G/UV-254 of 0.2 mm thickness (Merck, Germany). Elemental analyses were recorded using a ThermoFinnigan FLASH EA1112 CHN analyzer.

## Strating materials: Catalysts and Arylidinemalononitriles:

All commercially available chemicals were used as received, unless otherwise noted. Baylis-Hillmann aldehyde derivatives **6i-6x** were synthesized according to the literature procedure.<sup>3</sup>

**Catalysts:** Catalysts (A, B, C and D) were synthesized according to the literature procedure.<sup>1, 2</sup> & Catalyst E, F, G and H were purchased from Sigma Aldrich and used as such.

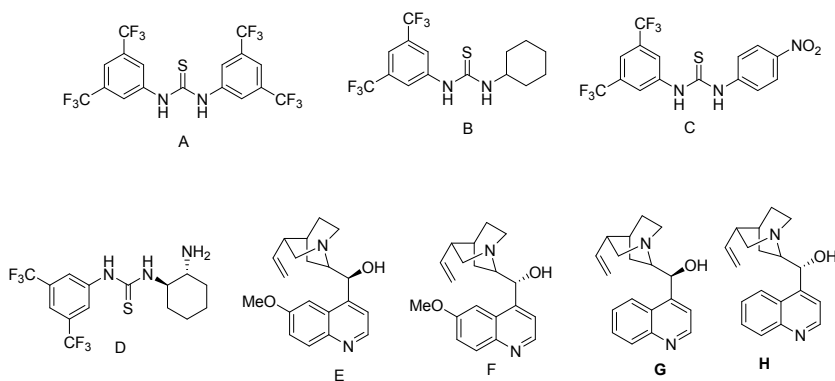

## General procedure for the synthesis of Arylidinemalononitriles and (E)-methyl 2-((4-chloro-2-(2,2 dicyanovinyl)phenoxy)methyl)-3-(4-methoxyphenyl)acrylate derivatives:

Aldehyde (1 mmol), malononitrile (1 mmol) in ethanol (3 mL) and catalytic amount of water were charged in a 25 mL round bottomed flask and the resulting solution was stirred for 3-5 h at room temperature. The consumption of the starting material was monitored by TLC. The precipitated solid was filtered and washed with ethanol (5-7 mL), dried under vacuum to obtain pure **1a-x** in good yields (78-89 %). The identities of products were confirmed by NMR giving good agreement with the assigned structures.

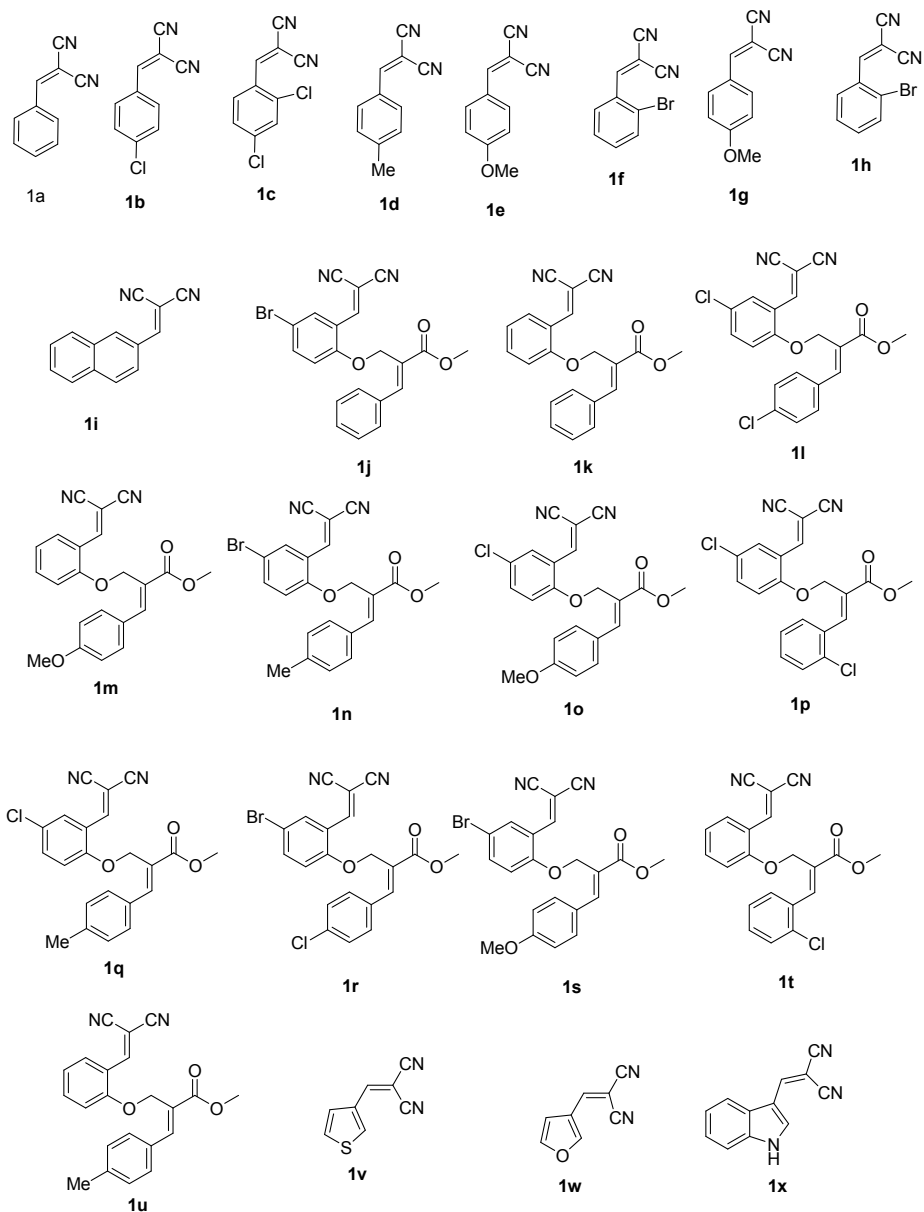

1. A. Kaisuki and M. Sejiro, *J. Am. Chem. Soc.*, 2011, 133, 16711.
2. D. Krzysztof, P. M. Anna and K. Piotr, *Org. Lett.*, 2012, 14, 4222.
3. M. Bakthadoss, N. Sivakumar, G. Sivakumar and G. Murugan, *Tetrahedron Lett.*, 2008, 49, 820-823

## Optimization details of nitroolefin synthesis:

| Entry | Catalyst (%)         | Base (%)                       | Time (h) | Temp (°C) | Solvent (Toluene) yield (%) |
|-------|----------------------|--------------------------------|----------|-----------|-----------------------------|
|       |                      |                                |          |           | Toluene <sup>a,b</sup>      |
| 1.    | --                   | DBU                            | 7        | 50        | --                          |
| 2.    | F                    | DBU                            | 7        | 50        | Trace                       |
| 3.    | F                    | DBU                            | 7        | 90        | Trace                       |
| 4.    | --                   | K-tOBu                         | 7        | 50        | Trace                       |
| 5.    | F                    | K-tOBu                         | 7        | 90        | Trace                       |
| 6.    | F                    | ---                            | 7        | 50        | --                          |
| 7.    | F                    | ---                            | 7        | 90        | ---                         |
| 8.    | A                    | DBU                            | 7        | 80        | --                          |
| 9.    | A                    | DABCO                          | 7        | 80        | --                          |
| 10.   | B                    | DBU                            | 7        | 80        | --                          |
| 11.   | B                    | DABCO                          | 10       | 80        | --                          |
| 12.   | C                    | DBU                            | 10       | 80        | --                          |
| 13.   | C                    | DABCO                          | 10       | 80        | --                          |
| 14.   | -                    | DABCO                          | 10       | 80        | --                          |
| 15.   | F                    | DMAP                           | 10       | 50        | Trace                       |
| 16.   | Diethylamino ethanol | DMAP-Di-tert-butylidicarbonate | 10       | 50        | 20                          |
| 17.   | Diethylamino ethanol | --                             | 10       | 50        | -                           |
| 18.   | --                   | DMAP-Di-tert-butylidicarbonate | 7        | 40        | 50                          |
| 19.   | --                   | DMAP-Di-tert-butylidicarbonate | 7        | 90        | 40                          |

<sup>a</sup>The reaction was performed with arylidinemalononitrile **1b** (0.1 mmol), nitromethane **2** (0.5 mmole), catalyst (10 mol %), Base (0.02 mmol) in 2 mL of solvents. <sup>b</sup> Isolated yields. <sup>c</sup>E/Z ratio is approximately >95/1. It was determined by NMR analysis of the crude products

## General procedure for the preparation of E-nitroolefin derivatives:

A mixture of arylidine/heteroarylidinemalononitriles/(E)-methyl 2-((4-chloro-2-(2,2-dicyanovinyl)phenoxy)methyl)-3-(4-methoxyphenyl)acrylate derivatives **1(a-x)** (0.1 mmol), nitromethane **2** (5 mmol) in toluene (3 mL) and catalytic amount of cinchona alkaloid **F** (10 mol %) were charged in a 25 mL round bottomed flask and the resulting solution was stirred for 2-5 h at room temperature. The consumption of the starting material was monitored by TLC. After completion of the reaction, DMAP (0.02 mmol) and di-tert-butylidicarbonate (2.0 equiv) was then added to a stirred solution of corresponding crude product **3**. After stirring the reaction at 45-50 deg. for 2-3 hrs followed by TLC, the solvent was removed under reduced pressure and the residue was purified by column chromatography on silica gel (3:97 % ethylacetate and petether) to afford pure products **6(a-x)** in average to good yields 65-90 %. The identities of products **6(a-x)** were confirmed by NMR and EI-HRMS, giving good agreement with the assigned structures.

## Isolation of intermediate 3u:

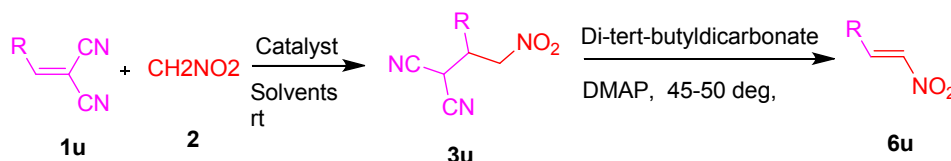

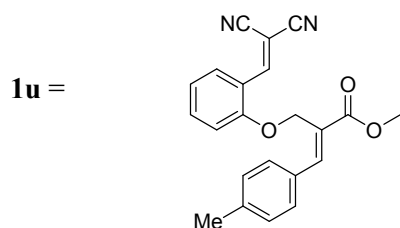

**3u: (E)-methyl 2-((2-(1,1-dicyano-3-nitropropan-2-yl)phenoxy)methyl)-3-(p-tolyl)acrylate:** Isolated as yellow gelly semi solid, 95 %,  $^1\text{H}$  NMR (400 MHz,  $\text{CDCl}_3$ ) 8.00 (1 H, s), 7.36 – 7.22 (3 H, m), 7.19 (3 H, t,  $J$  8.0), 6.97 (1 H, t,  $J$  7.5), 6.87 (1 H, d,  $J$  8.3), 4.96 (1 H, dd,  $J$  13.7, 9.0), 4.89 (2 H, s), 4.78 (1 H, dd,  $J$  13.7, 5.3), 4.61 (3 H, s), 4.24 (1 H, dd,  $J$  14.3, 8.7), 3.82 (3 H, s), 2.32 (3 H, s) ppm.  $^{13}\text{C}$  NMR:  $\delta_{\text{C}}$  (100 MHz,  $\text{CDCl}_3$ ) 167.64, 155.71, 146.51, 140.76, 131.46, 131.10, 130.10, 129.91, 129.53, 125.09, 122.16, 120.47, 112.85, 111.18, 111.15, 74.24, 63.70, 52.60, 24.77, 21.44 ppm.

#### Characterisation data of the synthesized nitroolefins:

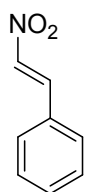

**6a: (E)-(2-nitrovinyl) benzene:** Isolated as yellow solid, 80 %, m.p: 57-58°C,  $^1\text{H}$  NMR (400 MHz,  $\text{CDCl}_3$ )  $\delta_{\text{H}}$  7.93 (1 H, d,  $J$  = 13.7), 7.51 (1 H, d,  $J$  = 13.7), 7.49 – 7.45 (2 H, m), 7.44 – 7.34 (3 H, m) ppm.  $^{13}\text{C}$  NMR  $\delta_{\text{C}}$  (100 MHz,  $\text{CDCl}_3$ ) 139.08, 137.15, 132.16, 130.10, 129.42, 129.16 ppm. EI-HRMS: Anal. Calcd for  $\text{C}_8\text{H}_7\text{NO}_2$ : 149.0477, Found: 149.0472. Elemental analysis: Anal. Calcd for  $\text{C}_8\text{H}_7\text{NO}_2$ : C, 64.42; H, 4.73; N, 9.39; O, 21.45 %. Found: C, 64.36; H, 4.79; N, 9.33; O, 21.49 %.

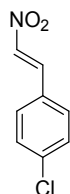

**6b: (E)-1-chloro-4-(2-nitrovinyl) benzene:** Isolated as yellow solid, 87 %, m.p: 111-112°C,  $^1\text{H}$  NMR (400 MHz,  $\text{CDCl}_3$ )  $\delta_{\text{H}}$  7.96 (1 H, d,  $J$  = 13.7), 7.57 (1 H, d,  $J$  = 13.7), 7.53 – 7.47 (2 H, m), 7.47 – 7.40 (2 H, m) ppm.  $^{13}\text{C}$  NMR (101 MHz,  $\text{CDCl}_3$ )  $\delta_{\text{C}}$  138.36, 137.71, 137.45, 130.29, 129.79, 128.55 ppm. EI-HRMS: Anal. Calcd for  $\text{C}_8\text{H}_6\text{ClNO}_2$ : 183.0087, Found: 183.0083. Elemental analysis: Anal. Calcd for  $\text{C}_8\text{H}_6\text{ClNO}_2$ : C, 52.34; H, 3.29; Cl, 19.31; N, 7.63; O, 17.43 %. Found: C, 52.30; H, 3.25; Cl, 19.38; N, 7.68; O, 17.37 %.

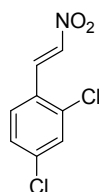

**6c: (E)-2,4-dichloro-1-(2-nitrovinyl)benzene:** Isolated as yellow solid, 85 %, m.p: 118-119°C,  $^1\text{H}$  NMR  $\delta_{\text{H}}$  (400 MHz,  $\text{CDCl}_3$ ) 8.33 (1 H, d,  $J$  = 13.7), 7.58 (1 H, d,  $J$  = 13.7), 7.55 – 7.49 (2 H, m), 7.34 (1 H, dd,  $J$  = 8.4, 1.9) ppm.  $^{13}\text{C}$  NMR  $\delta_{\text{C}}$  (101 MHz,  $\text{CDCl}_3$ ) 139.05, 138.49, 136.68, 133.99, 130.69, 129.29, 128.04, 127.12 ppm. EI-HRMS: Anal. Calcd for  $\text{C}_8\text{H}_5\text{Cl}_2\text{NO}_2$ : 216.9697, Found: 216.9695. Elemental

analysis: Anal. Calcd for  $C_8H_5Cl_2NO_2$ : C, 44.07; H, 2.31; Cl, 32.52; N, 6.42; O, 14.68 %. Found: C, 44.0; H, 2.37; Cl, 32.45; N, 6.35; O, 14.61 %.

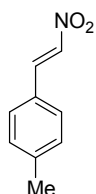

**6d: (E)-1-methyl-4-(2-nitrovinyl) benzene:** Isolated as yellow solid, 86 %, m.p: 105-106°C,  $^1H$  NMR  $\delta_H$  (400 MHz,  $CDCl_3$ ) 7.98 (1 H, d,  $J = 13.6$ ), 7.56 (1 H, d,  $J = 13.6$ ), 7.44 (2 H, d,  $J = 8.1$ ), 7.25 (2 H, d,  $J = 8.0$ ), 2.41 (3 H, s) ppm.  $^{13}C$  NMR  $\delta_C$  (100 MHz,  $CDCl_3$ ) 143.14, 139.20, 136.31, 130.17, 129.22, 127.31, 21.68 ppm. EI-HRMS: Anal. Calcd for  $C_9H_9NO_2$ : 163.0633, Found: 163.0630. Elemental analysis: Anal. Calcd for  $C_9H_9NO_2$ : C, 66.25; H, 5.56; N, 8.58; O, 14.68 %. Found: C, 66.20; H, 5.60; N, 8.51; O, 14.75 %.

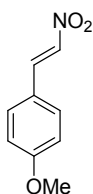

**6e: (E)-1-methoxy-4-(2-nitrovinyl) benzene:** Isolated as yellow solid, 90 %, m.p: 90-92°C,  $^1H$  NMR  $\delta_H$  (400 MHz,  $CDCl_3$ ) 7.96 (1 H, d,  $J = 13.6$ ), 7.52 (1 H, d,  $J = 6.0$ ), 7.51-7.48 (2 H, m), 6.99-6.92 (2 H, m), 3.86 (3 H, s) ppm.  $^{13}C$  NMR  $\delta_C$  (100 MHz,  $CDCl_3$ ) 162.99, 139.07, 135.02, 131.21, 122.55, 114.95, 55.55 ppm. EI-HRMS: Anal. Calcd for  $C_9H_9NO_3$ : 179.0582, Found: 179.0580. Elemental analysis: Anal. Calcd for  $C_9H_9NO_3$ : C, 60.33; H, 5.06; N, 7.82; O, 26.79 %. Found: C, 60.39; H, 5.01; N, 7.75; O, 26.73 %.

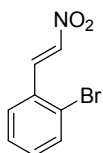

**6f: (E)-1-bromo-2-(2-nitrovinyl) benzene:** Isolated as yellow solid, 66 %, m.p: 140-142°C,  $^1H$  NMR  $\delta_H$  (400 MHz,  $CDCl_3$ ) 8.40 (1 H, d,  $J = 13.7$ ), 7.69 (1 H, dd,  $J = 7.8, 1.4$ ), 7.63 - 7.49 (2 H, m), 7.44-7.26 (2 H, m) ppm.  $^{13}C$  NMR  $\delta_C$  (100 MHz,  $CDCl_3$ ) 138.89, 137.60, 134.04, 132.92, 130.41, 128.49, 128.08, 126.35 ppm. EI-HRMS: Anal. Calcd for  $C_8H_6BrNO_2$ : 226.9582 Found: 226.9581. Elemental analysis: Anal. Calcd for  $C_8H_6BrNO_2$ : C, 42.13; H, 2.65; Br, 35.04; N, 6.14; O, 14.03 %. Found: C, 42.19; H, 2.69; Br, 35.01; N, 6.19; O, 14.07 %.

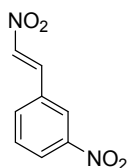

**6g: (E)-1-nitro-3-(2-nitrovinyl) benzene** Isolated as yellow solid, 60 %, m.p: 127-128°C,  $^1H$  NMR  $\delta_H$  (500 MHz, ) 8.28-8.09 (3 H, m), 7.61 (1 H, dd,  $J = 4.9, 2.2$ ).  $^{13}C$  NMR  $\delta_C$  (125 MHz,  $CDCl_3$ )

126.66, 126.39, 130.88, 131.97, 134.67, 148.95 ppm. EI-HRMS: Anal. Calcd for C<sub>8</sub>H<sub>6</sub>N<sub>2</sub>O<sub>4</sub>: 194.0328 Found: 194.0327. Elemental analysis: Anal. Calcd for C<sub>8</sub>H<sub>6</sub>N<sub>2</sub>O<sub>4</sub>: C, 49.49; H, 3.12; N, 14.43; O, 32.96 %. Found: C, 49.43; H, 3.17; N, 14.39; O, 32.91 %.

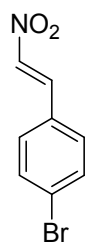

**6h: (E)-1-bromo-4-(2-nitrovinyl)benzene:** Isolated as yellow solid, 63 %, m.p: 143-145°C,  $\delta_{\text{H}}$  (500 MHz,) 7.94 (1 H, d,  $J = 13.7$ ), 7.58 (3 H, t,  $J = 10.8$ ), 7.41 (2 H, d,  $J = 8.4$ ) ppm.  $^{13}\text{C}$  NMR  $\delta_{\text{C}}$  (125 MHz, CDCl<sub>3</sub>) 127.01, 129.13, 130.60, 132.95, 137.64, 138.09 ppm. EI-HRMS: Anal. Calcd for C<sub>8</sub>H<sub>6</sub>BrNO<sub>2</sub>: 226.9582 Found: 226.9580. Elemental analysis: Anal. Calcd for C<sub>8</sub>H<sub>6</sub>BrNO<sub>2</sub>: C, 42.13; H, 2.65; Br, 35.04; N, 6.14; O, 14.03 %. Found: C, 42.09; H, 2.60; Br, 35.09; N, 6.10; O, 13.03 %.

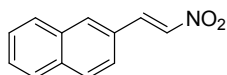

**6i: (E)-2-(2-nitrovinyl)naphthalene:** Isolated as yellow solid, 73 %, m.p: 128-130°C,  $^1\text{H}$  NMR  $\delta_{\text{H}}$  (400 MHz, CDCl<sub>3</sub>) 8.79 (1 H, d,  $J = 13.4$ ), 8.09 (1 H, d,  $J = 8.4$ ), 7.98 (1 H, d,  $J = 8.2$ ), 7.94 – 7.85 (1 H, m), 7.71 (1 H, d,  $J = 7.2$ ), 7.66 – 7.54 (3 H, m), 7.53 – 7.46 (1 H, m) ppm.  $^{13}\text{C}$  NMR  $\delta_{\text{C}}$  (100 MHz, CDCl<sub>3</sub>) 138.50, 136.09, 133.79, 132.58, 131.59, 129.09, 127.76, 126.98, 126.82, 126.41, 125.43, 122.98 ppm. EI-HRMS: Anal. Calcd for C<sub>12</sub>H<sub>9</sub>NO<sub>2</sub>: 199.0633, Found: 199.0632. Elemental analysis: Anal. Calcd for C<sub>12</sub>H<sub>9</sub>NO<sub>2</sub>: C, 72.35; H, 4.55; N, 7.03; O, 16.06 %. Found: C, 72.30; H, 4.47; N, 6.05; O, 16.01 %.

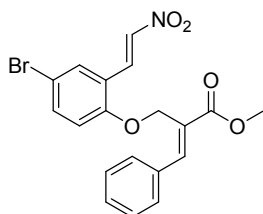

**6j: (E)-methyl 2-((4-bromo-2-((E)-2-nitrovinyl)phenoxy)methyl)-3-phenylacrylate:** Isolated as yellow solid, 81 %, m.p: 98-100°C,  $^1\text{H}$  NMR  $\delta_{\text{H}}$  (400 MHz, CDCl<sub>3</sub>) 8.11 (1 H, s), 7.99 (1 H, d,  $J = 13.7$ ), 7.71 (1 H, d,  $J = 13.7$ ), 7.58 (1 H, d,  $J = 2.4$ ), 7.51 (1 H, d,  $J = 2.5$ ), 7.39 (5 H, s), 6.88 (1 H, d,  $J = 8.9$ ), 4.99 (2 H, s), 3.89 (3 H, s).  $^{13}\text{C}$  NMR  $\delta_{\text{C}}$  (100 MHz, CDCl<sub>3</sub>) 167.19, 157.14, 146.43, 139.11, 135.62, 134.12, 134.07, 133.57, 129.95, 129.40, 128.92, 126.08, 121.63, 114.77, 113.73, 64.07, 52.59 ppm. EI-HRMS: Anal. Calcd for C<sub>19</sub>H<sub>16</sub>BrNO<sub>5</sub>: 417.0212, Found: 417.0210. Elemental analysis: Anal. Calcd for C<sub>19</sub>H<sub>16</sub>BrNO<sub>5</sub>: C, 54.56; H, 3.86; Br, 19.10; N, 3.35; O, 19.13 %. Found: C, 54.51; H, 3.82; Br, 18.70; N, 3.31; O, 18.15 %.

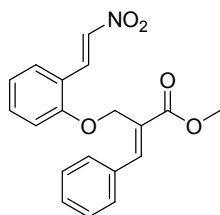

**6k: (E)-methyl 2-((2-((E)-2-nitrovinyl)phenoxy)methyl)-3-phenylacrylate:** Isolated as yellow solid, 83 %, m.p: 127-130°C,  $^1\text{H}$  NMR  $\delta_{\text{H}}$  (400 MHz, CDCl<sub>3</sub>) 8.11 (1 H, t,  $J = 6.8$ ), 7.78 (1 H, d,  $J = 13.6$ ), 7.50 – 7.40 (2 H, m), 7.39 – 7.36 (1 H, m), 7.05 (1 H, t,  $J = 7.5$ ), 6.99 (1 H, d,  $J = 8.4$ ), 5.01 (1 H, s), 3.89 (2 H, s).  $^{13}\text{C}$  NMR  $\delta_{\text{C}}$  (100 MHz, CDCl<sub>3</sub>) 167.34, 158.28, 146.22, 138.34, 135.28, 134.19, 133.38, 132.34, 129.84,



129.48, 128.88, 126.40, 121.62, 119.70, 112.96, 63.67, 52.55 ppm. EI-HRMS: Anal. Calcd for C<sub>19</sub>H<sub>17</sub>NO<sub>5</sub>: 339.1107, Found: 339.1105. Elemental analysis: Anal. Calcd for C<sub>19</sub>H<sub>17</sub>NO<sub>5</sub>: C, 67.25; H, 5.05; N, 4.13; O, 23.57 %. Found: C, 67.17; H, 5.01; N, 4.19; O, 23.51 %.

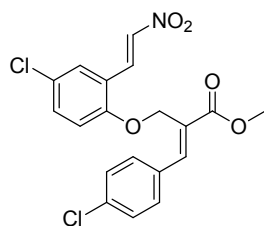

**6l: (E)-methyl 2-((4-chloro-2-((E)-2-nitrovinyl)phenoxy)methyl)-3-(4-chlorophenyl)acrylate:**

Isolated as yellow solid, 70 %, m.p: 135-137°C, <sup>1</sup>H NMR δ<sub>H</sub> (400 MHz, CDCl<sub>3</sub>) 7.98–7.87 (1 H, m), 7.62 (1 H, d, *J* = 13.7), 7.37 (1 H, d, *J* = 2.5), 7.32–7.22 (3 H, m), 6.87 (1 H, d, *J* = 8.9), 4.88 (1 H, s), 3.81 (2 H, s). <sup>13</sup>C NMR δ<sub>C</sub> (100 MHz, CDCl<sub>3</sub>) 166.95, 156.49, 145.02, 139.06, 136.18, 133.51, 132.80, 132.47, 131.04, 130.69, 129.23, 126.85, 126.61, 121.11, 114.38, 64.02, 52.67 ppm. EI-HRMS: Anal. Calcd for C<sub>19</sub>H<sub>15</sub>Cl<sub>2</sub>NO<sub>5</sub>: 407.0327, Found: 407.0325. Elemental analysis: Anal. Calcd for C<sub>19</sub>H<sub>15</sub>Cl<sub>2</sub>NO<sub>5</sub>: C, 55.90; H, 3.70; Cl, 17.37; N, 3.43; O, 19.60 %. Found: C, 55.85; H, 3.66; Cl, 17.31; N, 3.49; O, 19.55 %.

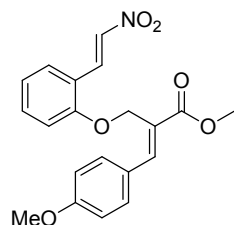

**6m: (E)-methyl 3-(4-methoxyphenyl)-2-((E)-2-nitrovinyl)phenoxy)methyl)acrylate:**

Isolated as yellow solid, 88 %, m.p: 108-110°C, <sup>1</sup>H NMR δ<sub>H</sub> (400 MHz, CDCl<sub>3</sub>) 8.24–8.01 (1 H, m), 7.77 (1 H, d, *J* = 13.6), 7.52–7.35 (2 H, m), 7.09–6.98 (1 H, m), 6.90 (1 H, d, *J* = 8.8), 5.04 (1 H, s), 3.87 (1 H, s), 3.81 (1 H, s). <sup>13</sup>C NMR δ<sub>C</sub> (100 MHz, CDCl<sub>3</sub>) 167.67, 161.12, 158.36, 146.17, 138.31, 135.30, 133.42, 132.34, 131.67, 126.66, 123.78, 121.57, 119.70, 114.40, 112.99, 63.82, 55.38, 52.42 ppm. EI-HRMS: Anal. Calcd for C<sub>20</sub>H<sub>19</sub>NO<sub>6</sub>: 369.1212, Found: 369.1211. Elemental analysis: Anal. Calcd for C<sub>20</sub>H<sub>19</sub>NO<sub>6</sub>: C, 65.03; H, 5.18; N, 3.79; O, 25.99 %. Found: C, 64.06; H, 5.12; N, 3.72; O, 26.06 %.

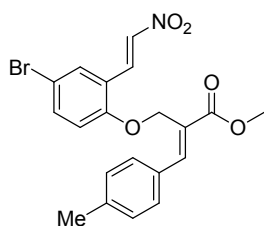

**6n: (E)-methyl 2-((4-bromo-2-((E)-2-nitrovinyl)phenoxy)methyl)-3-(p-tolyl)acrylate:**

Isolated as yellow solid, 78 %, m.p: 123-140°C, <sup>1</sup>H NMR δ<sub>H</sub> (400 MHz, CDCl<sub>3</sub>) 8.14–7.92 (1 H, m), 7.71 (1 H, d, *J* = 13.6), 7.58 (1 H, d, *J* = 2.4), 7.50 (1 H, dd, *J* = 8.8, 2.5), 7.33–7.25 (1 H, m), 7.20 (1 H, d, *J* = 8.0), 6.90 (1 H, d, *J* = 8.9), 5.00 (1 H, s), 3.88 (2 H, s), 2.36 (2 H, s) ppm. <sup>13</sup>C NMR δ<sub>C</sub> (100 MHz, CDCl<sub>3</sub>) 167.36, 157.19, 146.61, 140.53, 139.11, 135.62, 134.15, 133.61, 131.22, 129.67, 129.58, 125.03, 121.62, 114.77, 113.66, 64.14, 52.52, 21.41 ppm. EI-HRMS: Anal. Calcd for C<sub>20</sub>H<sub>18</sub>BrNO<sub>5</sub>: 431.0368, Found: 431.0366. Elemental analysis: Anal. Calcd for C<sub>20</sub>H<sub>18</sub>BrNO<sub>5</sub>: C, 55.57; H, 4.20; Br, 18.48; N, 3.24; O, 18.51 %. Found: C, 55.51; H, 4.17; Br, 18.43; N, 3.29; O, 18.43 %.

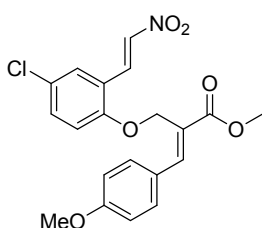

**6o: (E)-methyl 2-((4-chloro-2-((E)-2-nitrovinyl)phenoxy)methyl)-3-(4-methoxyphenyl)acrylate:**

Isolated as yellow solid, 81 %, m.p: 140-142°C, <sup>1</sup>H NMR δ<sub>H</sub> (400 MHz, CDCl<sub>3</sub>) 8.08–7.96 (1 H, m), 7.71 (1 H, d, *J* = 13.7), 7.44 (1 H, d, *J* = 2.6), 7.39 (1 H, dd, *J* = 8.9, 2.7), 7.00 (1 H, d, *J* = 8.9), 6.91 (1 H, d, *J* = 8.8), 5.03 (1 H, s), 3.87 (1 H, s), 3.82 (2 H, s) ppm. <sup>13</sup>C NMR δ<sub>C</sub> (100 MHz, CDCl<sub>3</sub>) 167.57, 161.20, 156.74, 146.37, 139.11, 133.72, 132.76, 131.63, 131.18, 126.59, 126.53, 123.45, 121.13, 114.44, 114.42, 64.30, 55.40, 52.46 ppm. EI-HRMS: Anal. Calcd for C<sub>20</sub>H<sub>18</sub>ClNO<sub>6</sub>: 403.0823, Found: 403.0822. Elemental analysis: Anal. Calcd for C<sub>20</sub>H<sub>18</sub>ClNO<sub>6</sub>: C, 59.49; H, 4.49; Cl, 8.78; N, 3.47; O, 23.77 %. Found: C, 59.43; H, 4.42; Cl, 8.74; N, 3.54; O, 23.70 %.

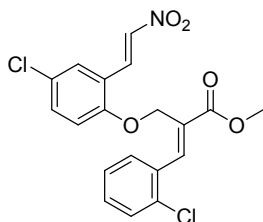**6p:(E)-methyl 2-((4-chloro-2-((E)-2-nitrovinyl)phenoxy)methyl)-3-(2-chloro-phenyl)-**

**acrylate:** Isolated as yellow solid, 72 %, m.p: 136-138°C, <sup>1</sup>H NMR δ<sub>H</sub> (400 MHz, CDCl<sub>3</sub>) 8.15 (1 H, s), 7.97 (1 H, d, *J* = 13.7), 7.69 (1 H, d, *J* = 13.7), 7.47–7.39 (2 H, m), 7.33 (3 H, ddd, *J* = 8.6, 5.4, 2.0), 7.29–7.22 (1 H, m), 6.86 (1 H, d, *J* = 8.9), 4.91 (2 H, s), 3.91 (3 H, s) ppm. <sup>13</sup>C NMR δ<sub>C</sub> (100 MHz, CDCl<sub>3</sub>) 166.60, 156.47, 142.93, 139.03, 134.25, 133.54, 132.86, 132.71, 130.93, 130.85, 129.98, 129.90, 128.18, 127.02, 126.73, 121.12, 114.47, 64.34, 52.71 ppm. EI-HRMS: Anal. Calcd for C<sub>19</sub>H<sub>15</sub>Cl<sub>2</sub>NO<sub>5</sub>: 407.0327, Found: 407.0325. Elemental analysis: Anal. Calcd for C<sub>19</sub>H<sub>15</sub>Cl<sub>2</sub>NO<sub>5</sub>: C, 55.90; H, 3.70; Cl, 17.37; N, 3.43; O, 19.60 %. Found: C, 55.84; H, 3.64; Cl, 17.31; N, 3.49; O, 19.53 %.

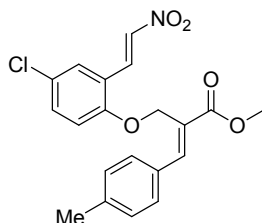

**6q: (E)-methyl 2-((4-chloro-2-((E)-2-nitrovinyl)phenoxy)methyl)-3-(p-tolyl)acrylate:** Isolated as yellow solid, 75 %, m.p: 149-151°C, <sup>1</sup>H NMR δ<sub>H</sub> (400 MHz, CDCl<sub>3</sub>) 8.09–7.94 (1 H, m), 7.72 (1 H, d, *J* = 13.7), 7.43 (1 H, d, *J* = 2.6), 7.37 (1 H, dd, *J* = 8.9, 2.6), 7.30 (1 H, d, *J* = 8.1), 7.20 (1 H, d, *J* = 8.0), 6.95 (1 H, d, *J* = 8.9), 5.00 (1 H, s), 3.88 (2 H, s), 2.36 (2 H, s) ppm. <sup>13</sup>C NMR δ<sub>C</sub> (100 MHz, CDCl<sub>3</sub>) 167.38, 156.71, 146.59, 140.52, 139.12, 133.71, 132.72, 131.23, 131.19, 129.67, 129.58, 126.58, 125.07, 121.13, 114.40, 64.21, 52.51, 21.41 ppm. EI-HRMS: Anal. Calcd for C<sub>20</sub>H<sub>18</sub>ClNO<sub>5</sub>: 387.0874, Found: 387.0873. Elemental analysis: Anal. Calcd for C<sub>20</sub>H<sub>18</sub>ClNO<sub>5</sub>: C, 61.94; H, 4.68; Cl, 9.14; N, 3.61; O, 20.63 %. Found: C, 61.99; H, 4.61; Cl, 9.19; N, 3.52; O, 20.55 %.

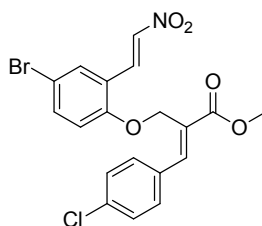**6r: (E)-methyl 2-((4-bromo-2-((E)-2-nitrovinyl)phenoxy)methyl)-3-(4-**

**chlorophenyl)acrylate:** Isolated as yellow solid, 81 %, m.p: 133-135°C, <sup>1</sup>H NMR δ<sub>H</sub> (400 MHz, CDCl<sub>3</sub>) 8.06–7.96 (1 H, m), 7.69 (1 H, d, *J* = 13.7), 7.59 (1 H, d, *J* = 2.4), 7.52 (1 H, dd, *J* = 8.8, 2.4), 7.41–7.30 (2 H, m), 6.89 (1 H, d, *J* = 8.9), 4.95 (1 H, s), 3.89 (2 H, s) ppm. <sup>13</sup>C NMR δ<sub>C</sub> (100 MHz, CDCl<sub>3</sub>) 166.93,

156.97, 145.06, 139.06, 136.21, 135.70, 134.02, 133.42, 132.45, 130.68, 129.24, 126.57, 121.60, 114.73, 113.95, 63.94, 52.68 ppm. EI-HRMS: Anal. Calcd for C<sub>19</sub>H<sub>15</sub>BrClNO<sub>5</sub>: 450.9822, Found: 450.9820. Elemental analysis: Anal. Calcd for C<sub>19</sub>H<sub>15</sub>BrClNO<sub>5</sub>: C, 50.41; H, 3.34; Br, 17.65; Cl, 7.83; N, 3.09; O, 17.67 %. Found: C, 50.35; H, 3.30; Br, 17.69; Cl, 7.88; N, 3.02; O, 17.61 %.

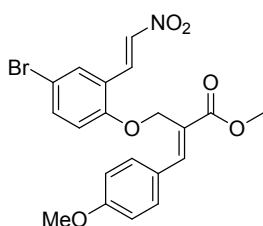

**6s: (E)-methyl 2-((4-bromo-2-((E)-2-nitrovinyl)phenoxy)methyl)-3-(4-methoxyphenyl)acrylate:**

Isolated as yellow solid, 81 %, m.p: 148-150°C, <sup>1</sup>H NMR δ<sub>H</sub> (400 MHz, CDCl<sub>3</sub>) 8.05 (1 H, s), 7.99 (1 H, d, *J* = 13.7), 7.70 (1 H, d, *J* = 13.6), 7.57 (1 H, d, *J* = 2.4), 7.51 (1 H, dd, *J* = 8.8, 2.4), 7.38 (2 H, d, *J* = 8.7), 6.92 (3 H, dd, *J* = 16.2, 8.8), 5.02 (2 H, s), 3.87 (3 H, s), 3.82 (3 H, s) ppm. <sup>13</sup>C NMR: δ<sub>C</sub> (100 MHz, CDCl<sub>3</sub>) 167.55, 161.20, 157.22, 146.37, 139.08, 135.67, 134.12, 133.61, 131.64, 126.51, 123.41, 121.61, 114.81, 114.45, 113.66, 64.24, 55.40, 52.46 ppm. EI-HRMS: Anal. Calcd for C<sub>20</sub>H<sub>18</sub>BrNO<sub>6</sub>: 447.0317, Found: 447.0315. Elemental analysis: Anal. Calcd for C<sub>20</sub>H<sub>18</sub>BrNO<sub>6</sub>: C, 53.59; H, 4.05; Br, 17.83; N, 3.12; O, 21.42 %. Found: C, 53.51; H, 4.01; Br, 17.89; N, 3.05; O, 21.35 %.

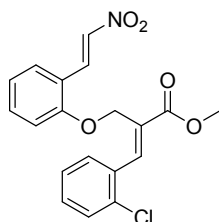

**6t: (E)-methyl 3-(2-chlorophenyl)-2-((E)-2-nitrovinyl)phenoxy)methyl)acrylate:**

Isolated as yellow solid, 86 %, m.p: 125-128°C, <sup>1</sup>H NMR δ<sub>H</sub> (400 MHz, CDCl<sub>3</sub>) 8.16 (1 H, s), 8.08 (1 H, d, *J* = 13.6), 7.75 (1 H, d, *J* = 13.6), 7.49-7.36 (4 H, m), 7.32 (1 H, m), 7.26-7.20 (1 H, m), 7.04 (1 H, t, *J* = 7.6), 6.92 (1 H, d, *J* = 8.4), 4.92 (2 H, s), 3.92 (3 H, s) ppm. <sup>13</sup>C NMR: δ<sub>C</sub> (100 MHz, CDCl<sub>3</sub>) 166.72, 156.52, 142.71, 141.53, 135.12, 134.88, 133.33, 132.05, 131.78, 130.74, 130.09, 129.83, 128.89, 128.46, 128.00, 126.99, 125.12, 121.69, 113.84, 113.03, 63.88, 49.48 ppm. EI-HRMS: Anal. Calcd for C<sub>19</sub>H<sub>16</sub>ClNO<sub>5</sub>: 373.0717, Found: 373.0715. Elemental analysis: Anal. Calcd for C<sub>19</sub>H<sub>16</sub>ClNO<sub>5</sub>: C, 61.05; H, 4.31; Cl, 9.48; N, 3.75; O, 21.40 %. Found: C, 61.0; H, 4.25; Cl, 9.42; N, 3.70; O, 21.33 %.

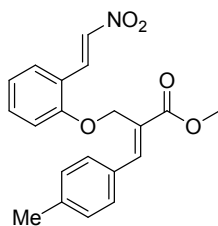

**6u: (E)-methyl 2-((2-((E)-2-nitrovinyl)phenoxy)methyl)-3-(p-tolyl)acrylate:**

Isolated as yellow solid, 82 %, m.p: 118-120°C, <sup>1</sup>H NMR (400 MHz, CDCl<sub>3</sub>) δ<sub>H</sub> 8.10 (1 H, d, *J* = 14.8), 7.77 (1 H, d, *J* = 13.6), 7.44 (1 H, dd, *J* = 18.4, 8.0), 7.32 (1 H, d, *J* = 7.8), 7.25 (1 H, t, *J* = 7.5), 7.18 (2 H, d, *J* = 7.4), 7.03 (1 H, dd, *J* = 17.7, 8.1), 5.02 (1 H, s), 3.88 (2 H, s), 2.35 (3 H, s) ppm. <sup>13</sup>C NMR: δ<sub>C</sub> (100 MHz, CDCl<sub>3</sub>) 167.50, 158.34, 146.36, 140.36, 138.34, 135.27, 133.35, 132.32, 131.35, 129.64, 129.62, 129.05, 128.23, 125.41, 125.31, 121.57, 119.72, 112.99, 63.76, 52.46, 21.39 ppm. EI-HRMS: Anal. Calcd for C<sub>20</sub>H<sub>19</sub>NO<sub>5</sub>: 353.1263, Found: 353.1260. Elemental analysis: Anal. Calcd for C<sub>20</sub>H<sub>19</sub>NO<sub>5</sub>: C, 67.98; H, 5.42; N, 3.96; O, 22.64 %. Found: C, 67.91; H, 5.48; N, 3.90; O, 22.60 %.

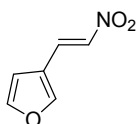

**7v: (E)-3-(2-nitrovinyl)furan** : Isolated as yellow solid, 75 %, m.p: 74-76°C,  $^1\text{H}$  NMR  $\delta_{\text{H}}$  (400 MHz,  $\text{CDCl}_3$ ) 7.94 (1 H, d,  $J = 13.5$ ), 7.84–7.83 (1 H, m), 7.52 (1 H, t,  $J = 1.3$ ), 7.41 (1 H, s), 7.37 (1 H, s), 7.26 (1 H, s), 6.57 (1 H, d,  $J = 1.9$ ).  $^{13}\text{C}$  NMR  $\delta_{\text{C}}$  (100 MHz,  $\text{CDCl}_3$ ) 147.29, 145.37, 136.74, 129.53, 118.21, 107.25 ppm. EI-HRMS: Anal. Calcd for  $\text{C}_6\text{H}_6\text{NO}_3$ : 139.0269, Found: 139.0267. Elemental analysis: Anal. Calcd for  $\text{C}_6\text{H}_6\text{NO}_3$ : C, 51.80; H, 3.62; N, 10.07; O, 34.50 %. Found: C, 51.74; H, 3.67; N, 10.01; O, 34.45 %.

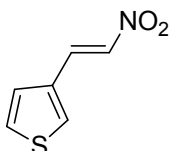

**7w: (E)-3-(2-nitrovinyl)thiophene**: Isolated as yellow solid, 89 %, m.p: 87-90°C,  $^1\text{H}$  NMR  $\delta_{\text{H}}$  (400 MHz,  $\text{CDCl}_3$ ) 8.15 (1 H, d,  $J = 13.4$ ), 7.57 (1 H, d,  $J = 4.9$ ), 7.51–7.43 (2 H, m), 7.15 (1 H, dd,  $J = 5.1, 3.7$ ).  $^{13}\text{C}$  NMR  $\delta_{\text{C}}$  (100 MHz,  $\text{CDCl}_3$ ) 135.39, 134.62, 133.79, 132.09, 131.63, 128.90 ppm. EI-HRMS: Anal. Calcd for  $\text{C}_6\text{H}_5\text{NO}_2\text{S}$ : 155.0041, Found: 155.0040. Elemental analysis: Anal. Calcd for  $\text{C}_6\text{H}_5\text{NO}_2\text{S}$ : C, 46.44; H, 3.25; N, 9.03; O, 20.62; S, 20.66 %. Found: C, 46.40; H, 3.21; N, 9.09; O, 20.55; S, 20.60 %.

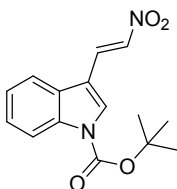

**7x: (E)-tert-butyl 3-(2-nitrovinyl)-1H-indole-1-carboxylate**: Isolated as yellow solid, 89 %,  $^1\text{H}$  NMR :  $\delta_{\text{H}}$  (400 MHz,  $\text{CDCl}_3$ ) 8.23 (1 H, d,  $J = 8.1$ ), 8.17 (1 H, d,  $J = 13.7$ ), 8.03 (1 H, s), 7.78 (1 H, d,  $J = 13.7$ ), 7.71 (1 H, dd,  $J = 7.2, 0.8$ ), 7.41 (2 H, dtd,  $J = 20.7, 7.4, 1.2$ ), 1.70 (9 H, s) ppm.  $^{13}\text{C}$  NMR:  $\delta_{\text{C}}$  (100 MHz,  $\text{CDCl}_3$ ) 148.63, 136.40, 135.79, 132.19, 131.58, 126.85, 125.97, 124.26, 120.20, 115.93, 112.51, 85.58, 28.10 ppm. EI-HRMS: Anal. Calcd for  $\text{C}_{15}\text{H}_{16}\text{N}_2\text{O}_4$ : 288.1110, Found: 288.1109. Elemental analysis: Anal. Calcd for  $\text{C}_{15}\text{H}_{16}\text{N}_2\text{O}_4$ : C, 62.49; H, 5.59; N, 9.72; O, 22.20; %. Found: C, 62.42; H, 5.53; N, 9.79; O, 22.14; %.

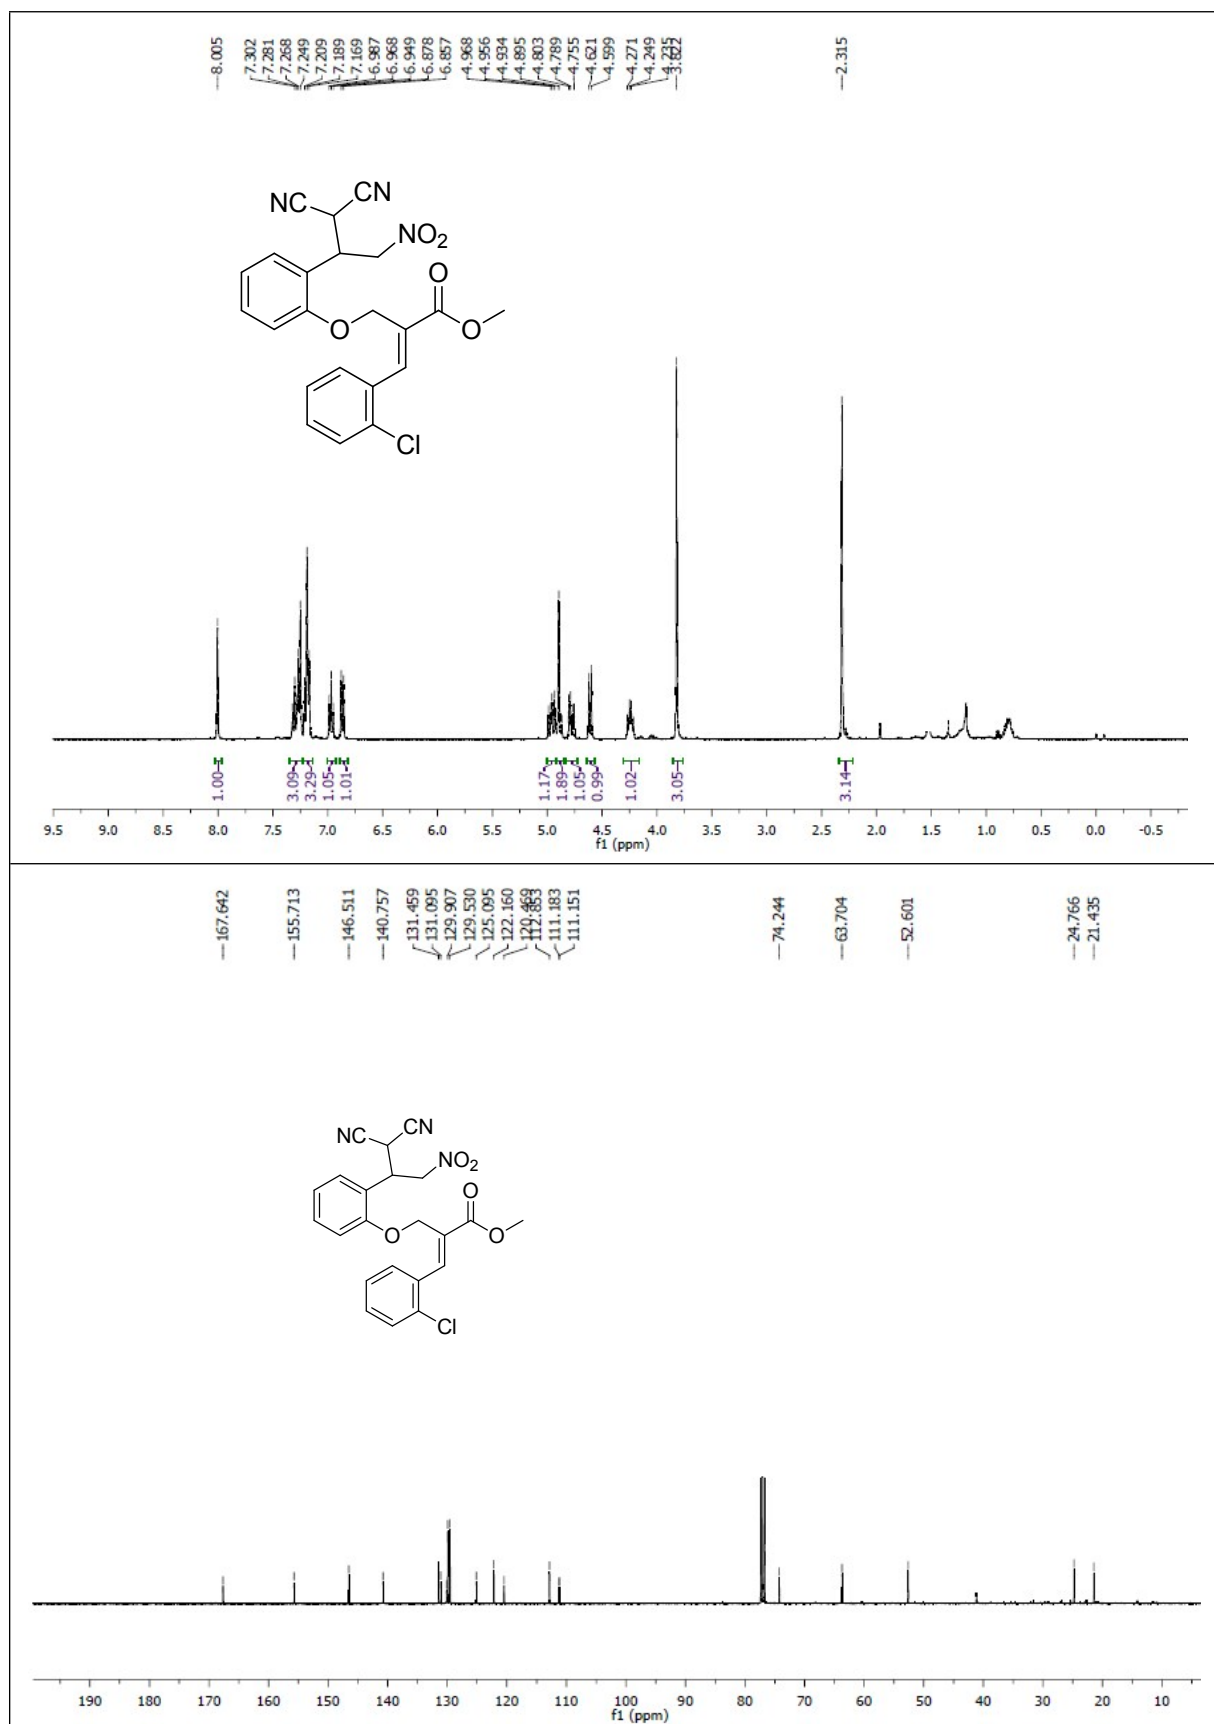

**<sup>1</sup>H and <sup>13</sup>C NMR Spectra of Compound (6a)**

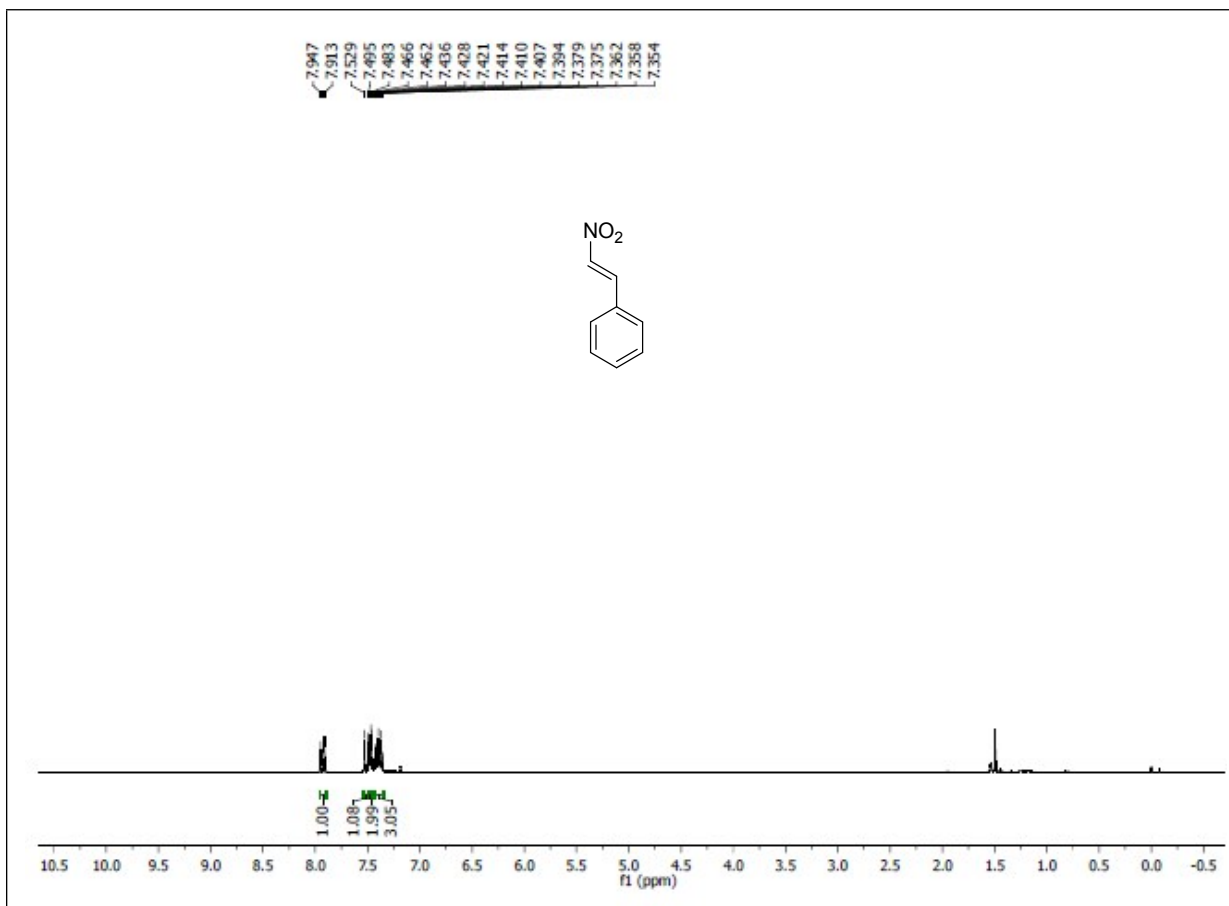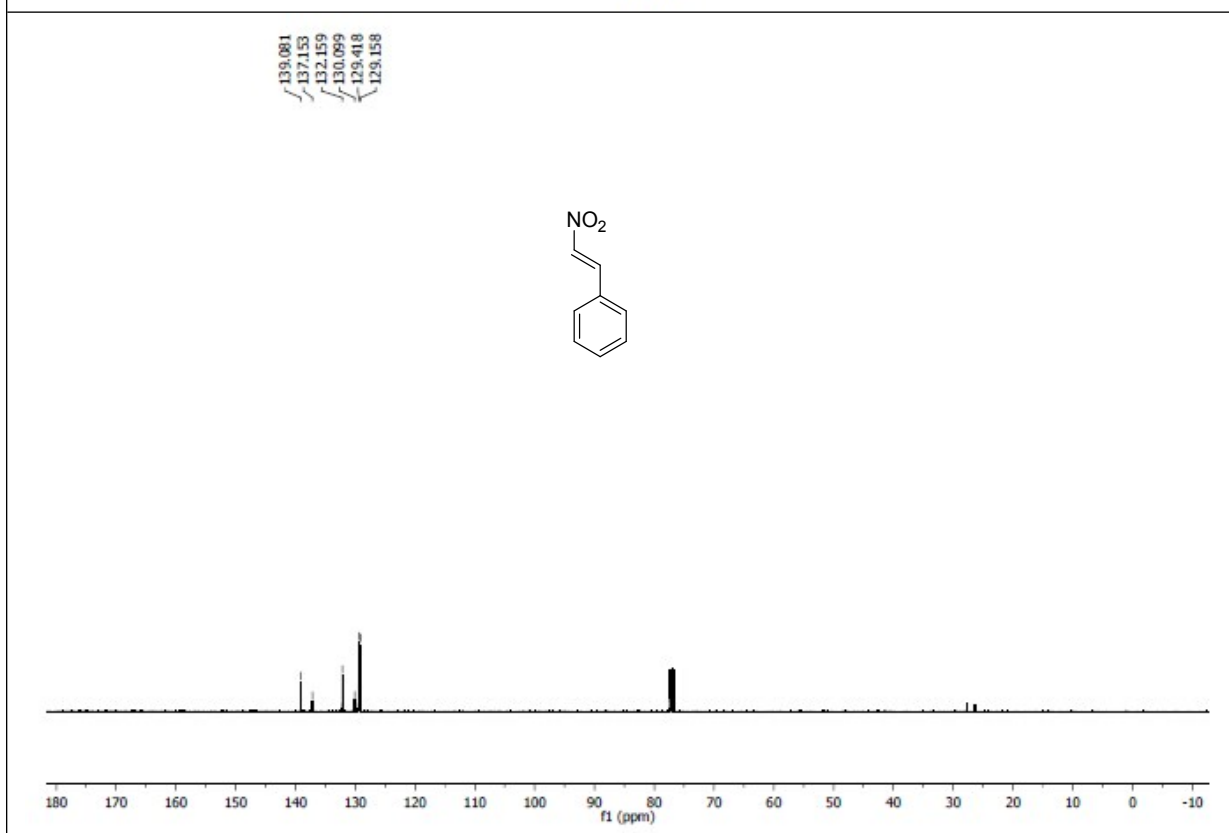

# $^1\text{H}$ and $^{13}\text{C}$ NMR Spectra of Compound (6b)

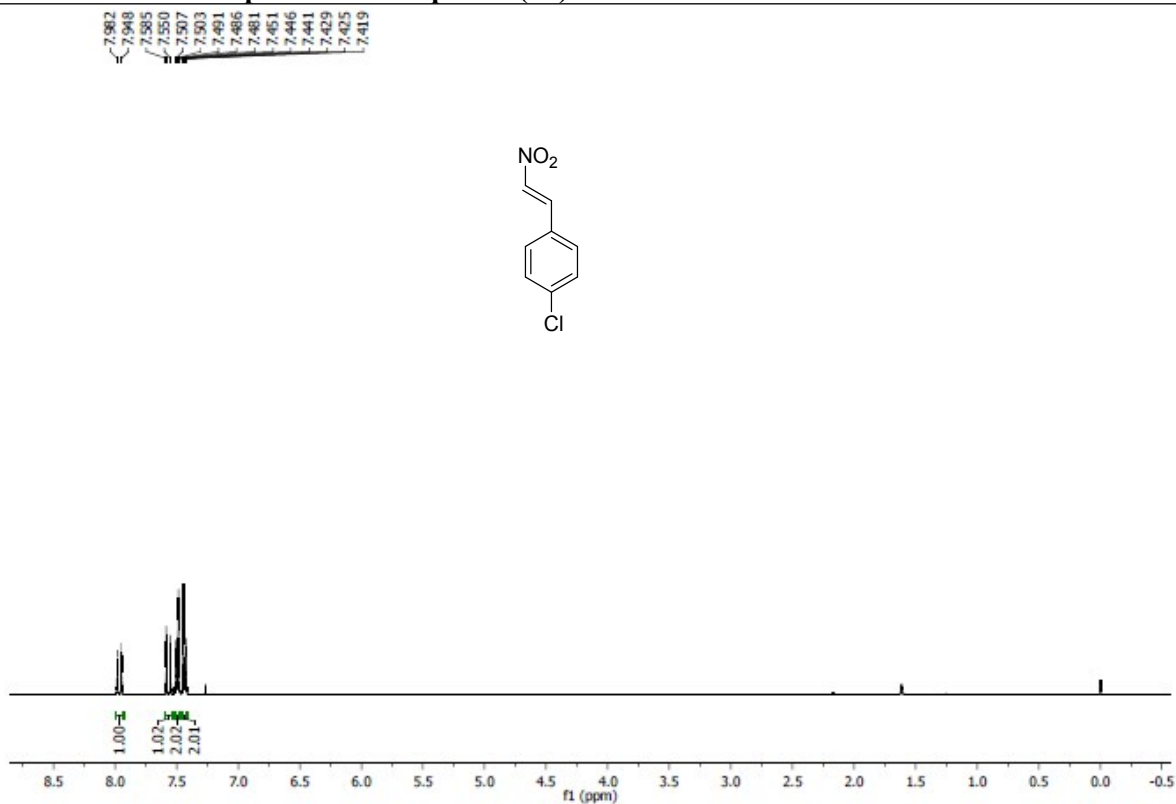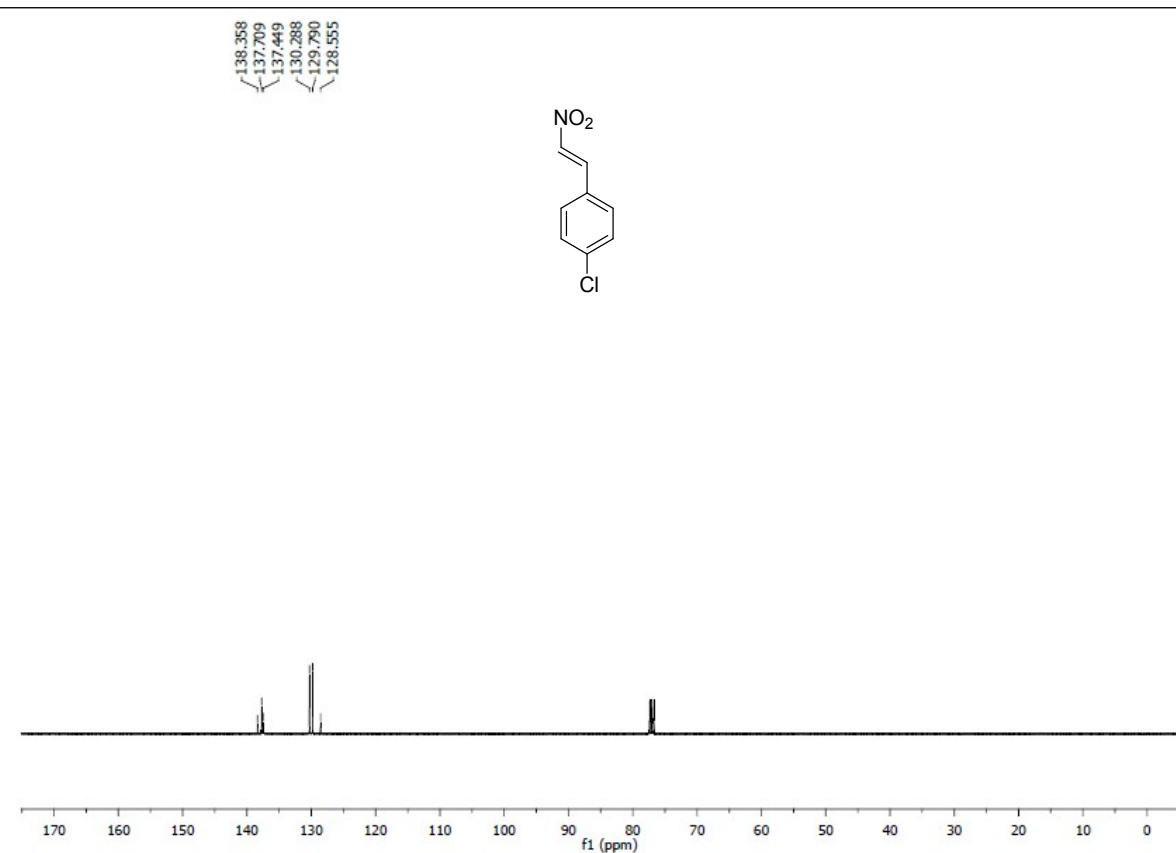

# <sup>1</sup>H and <sup>13</sup>C NMR Spectra of Compound (6c)

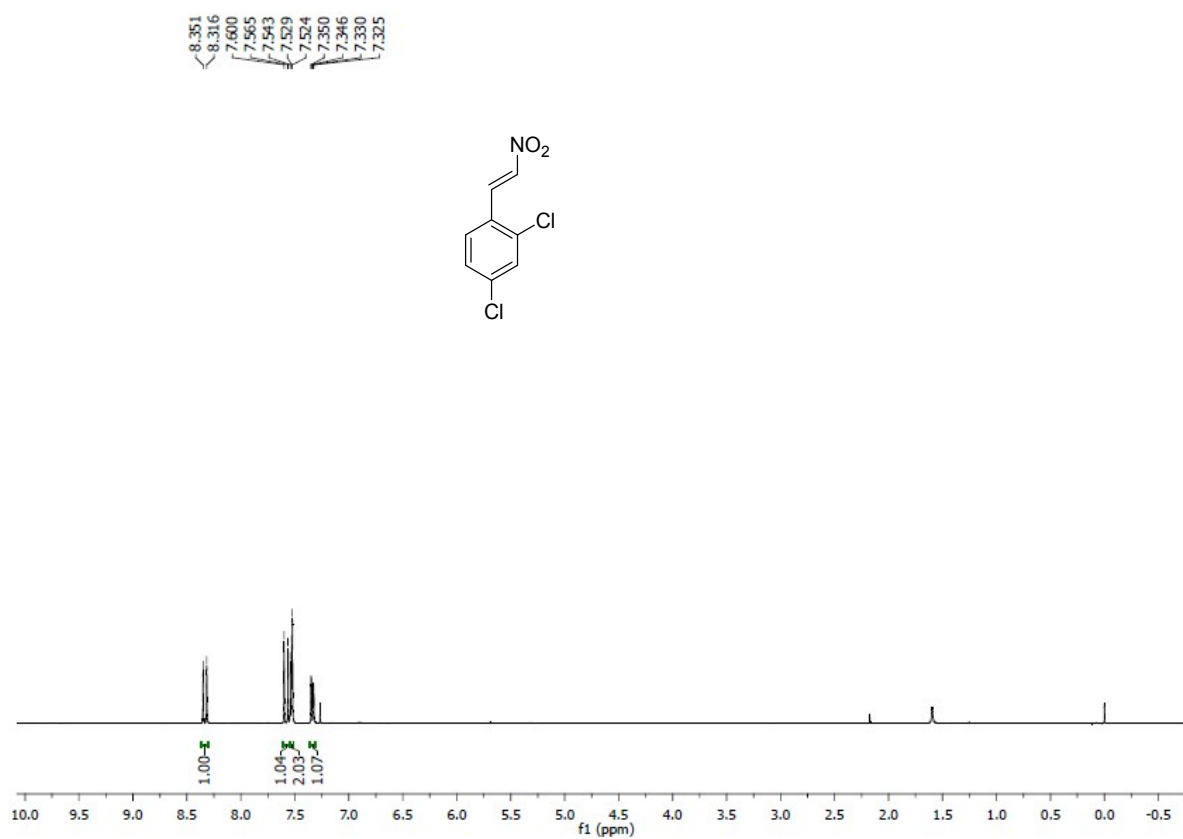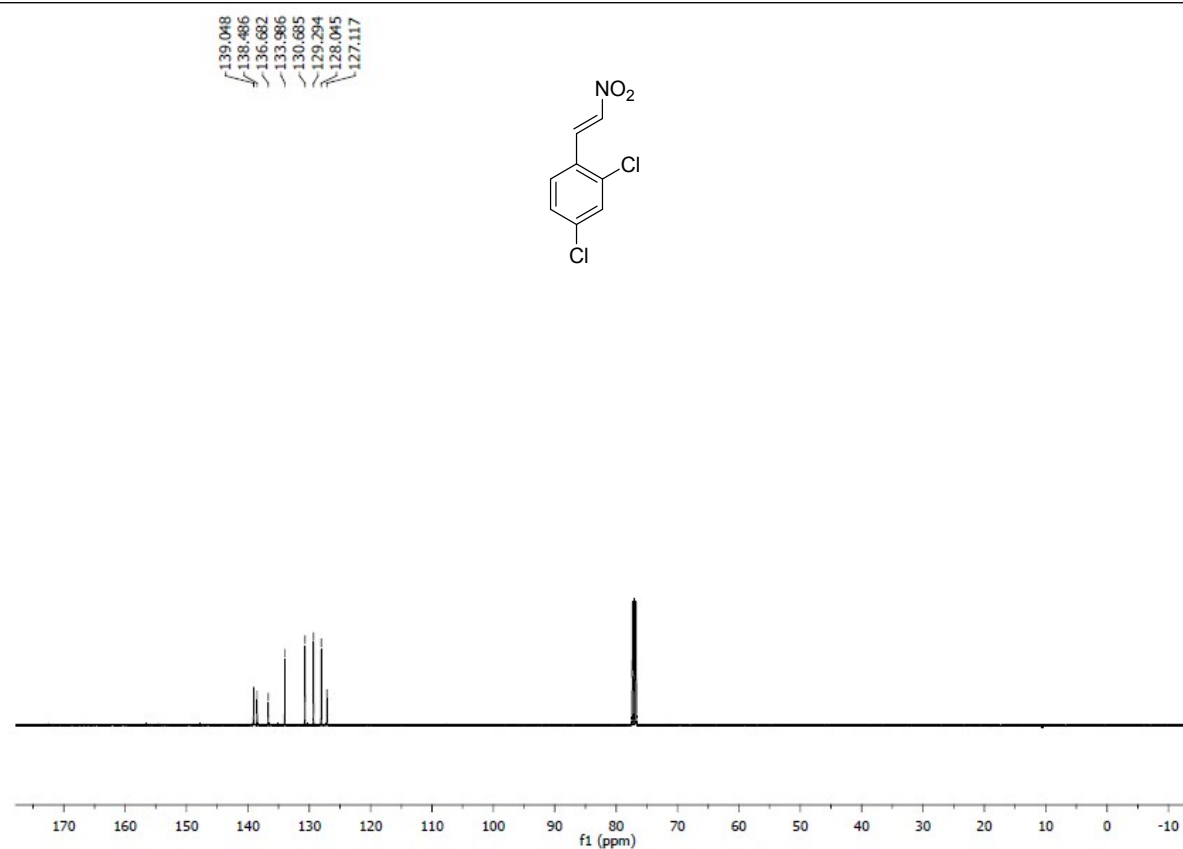



# <sup>1</sup>H and <sup>13</sup>C NMR Spectra of Compound (6d)

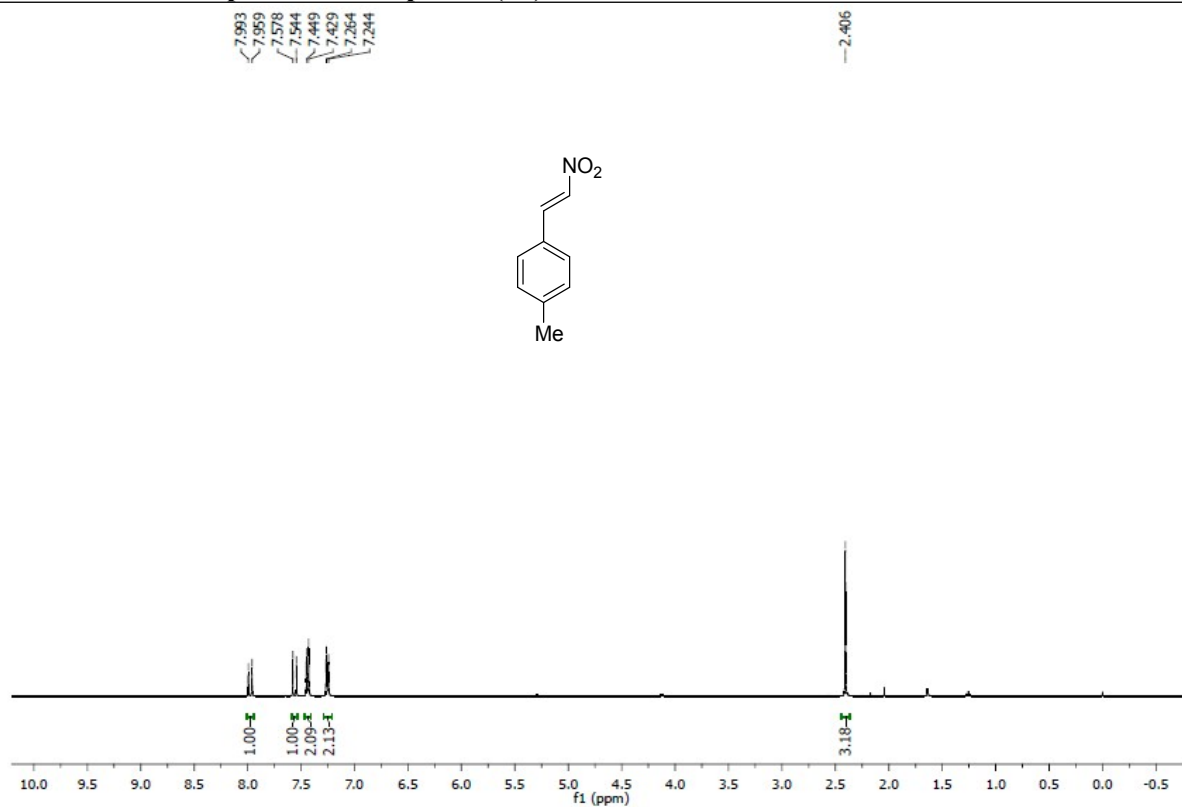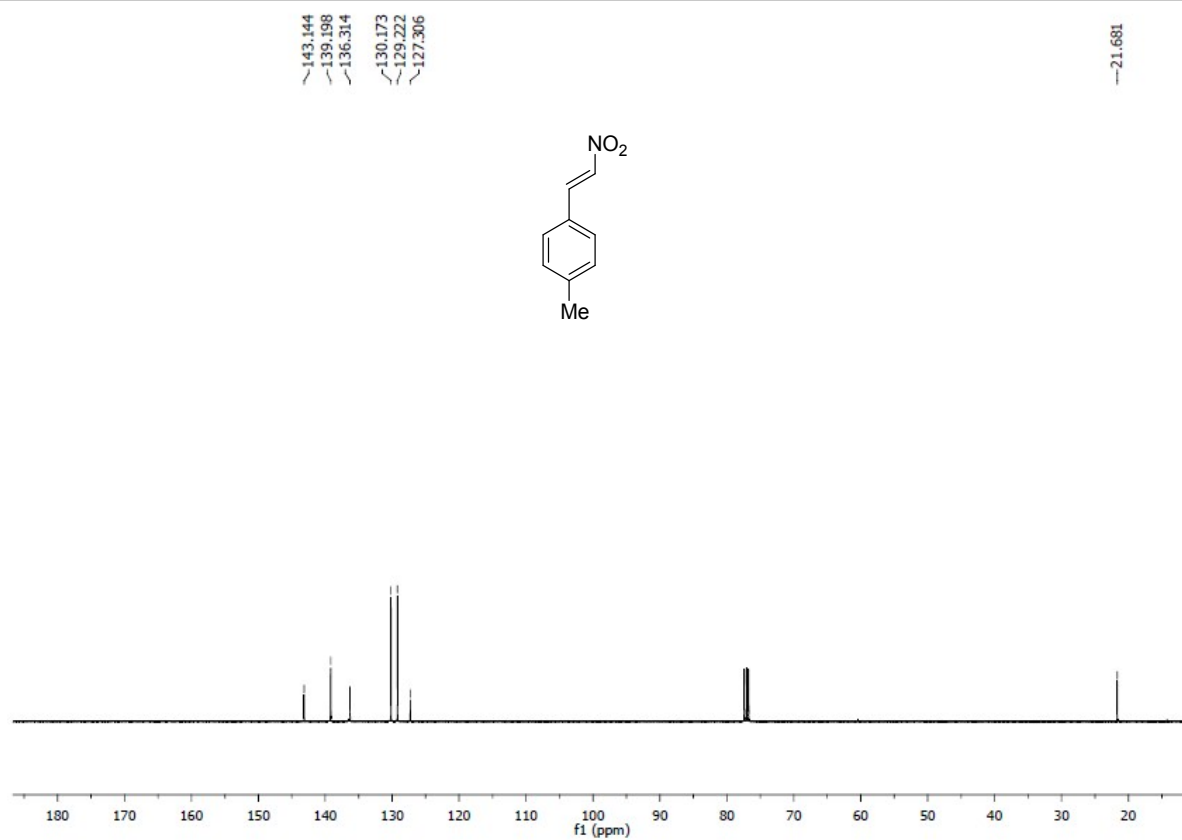

# <sup>1</sup>H and <sup>13</sup>C NMR Spectra of Compound (6e)

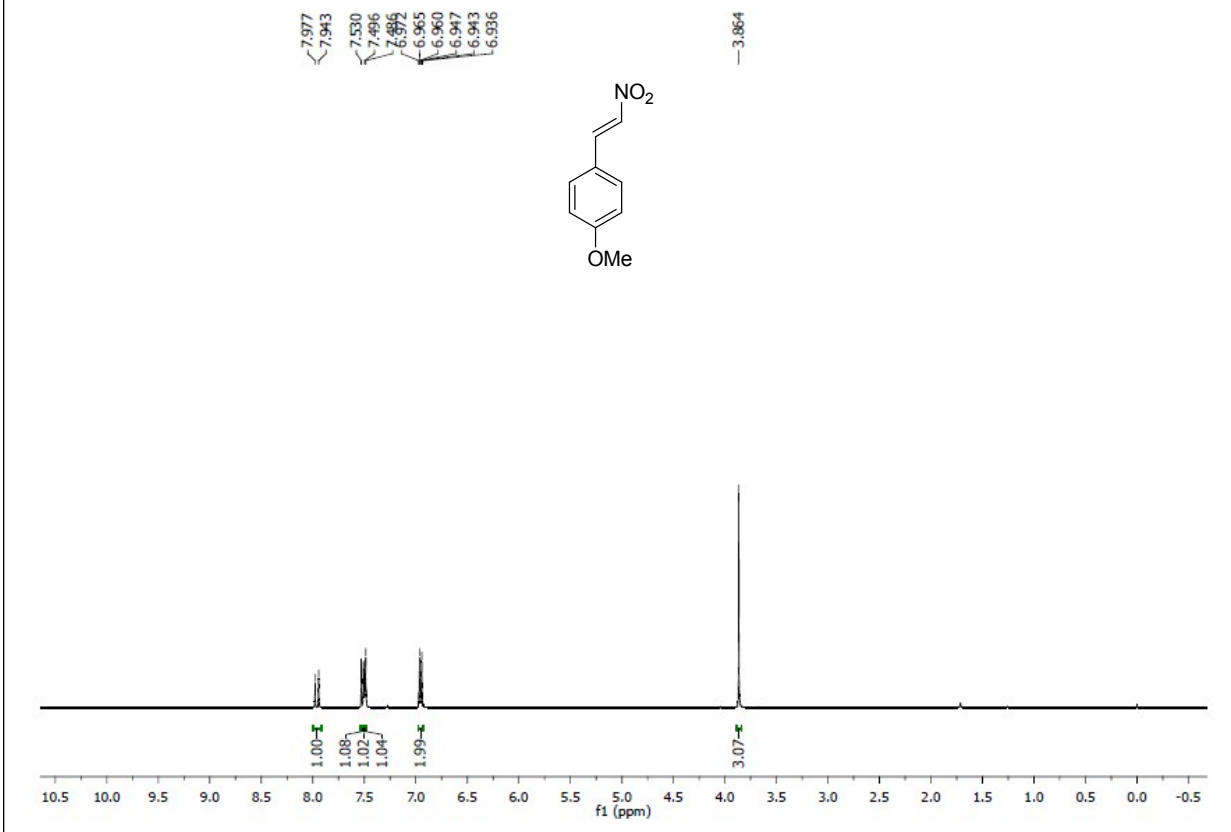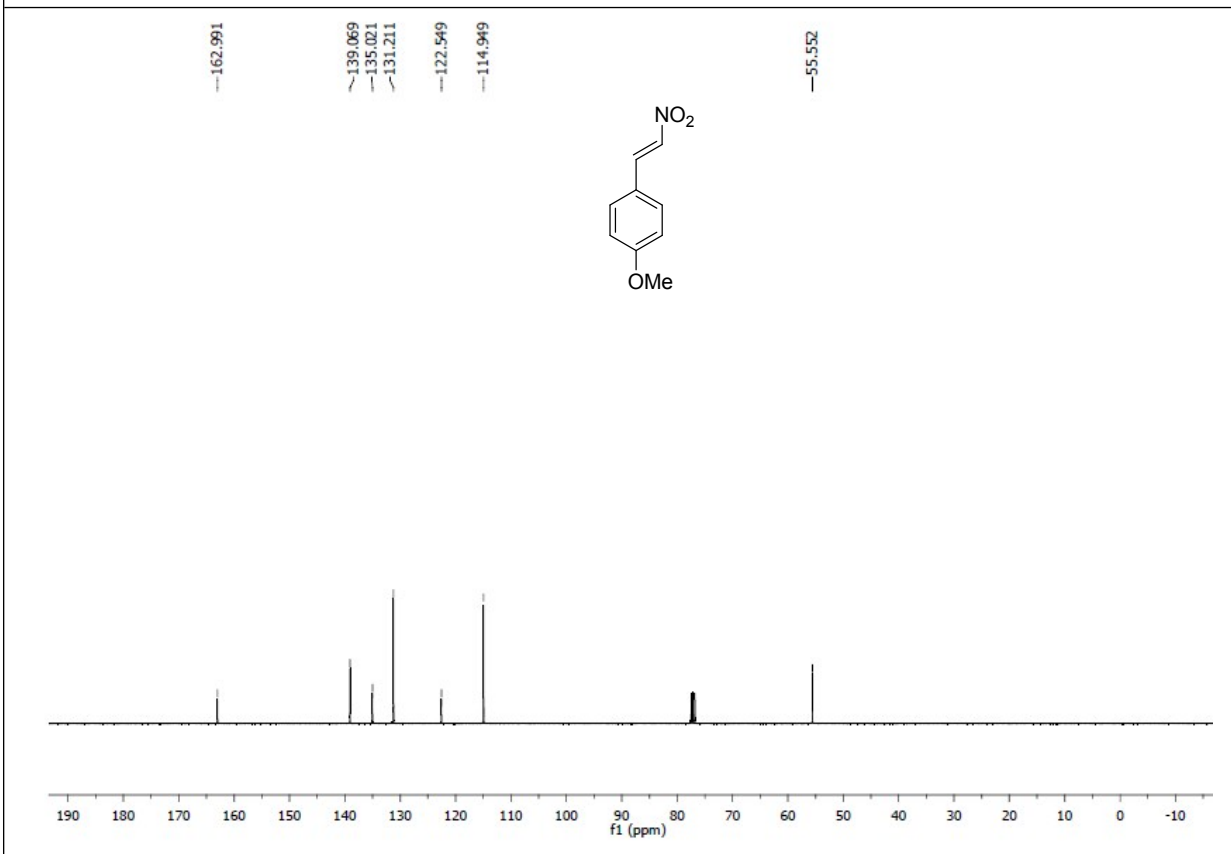

# <sup>1</sup>H and <sup>13</sup>C NMR Spectra of Compound (6f)

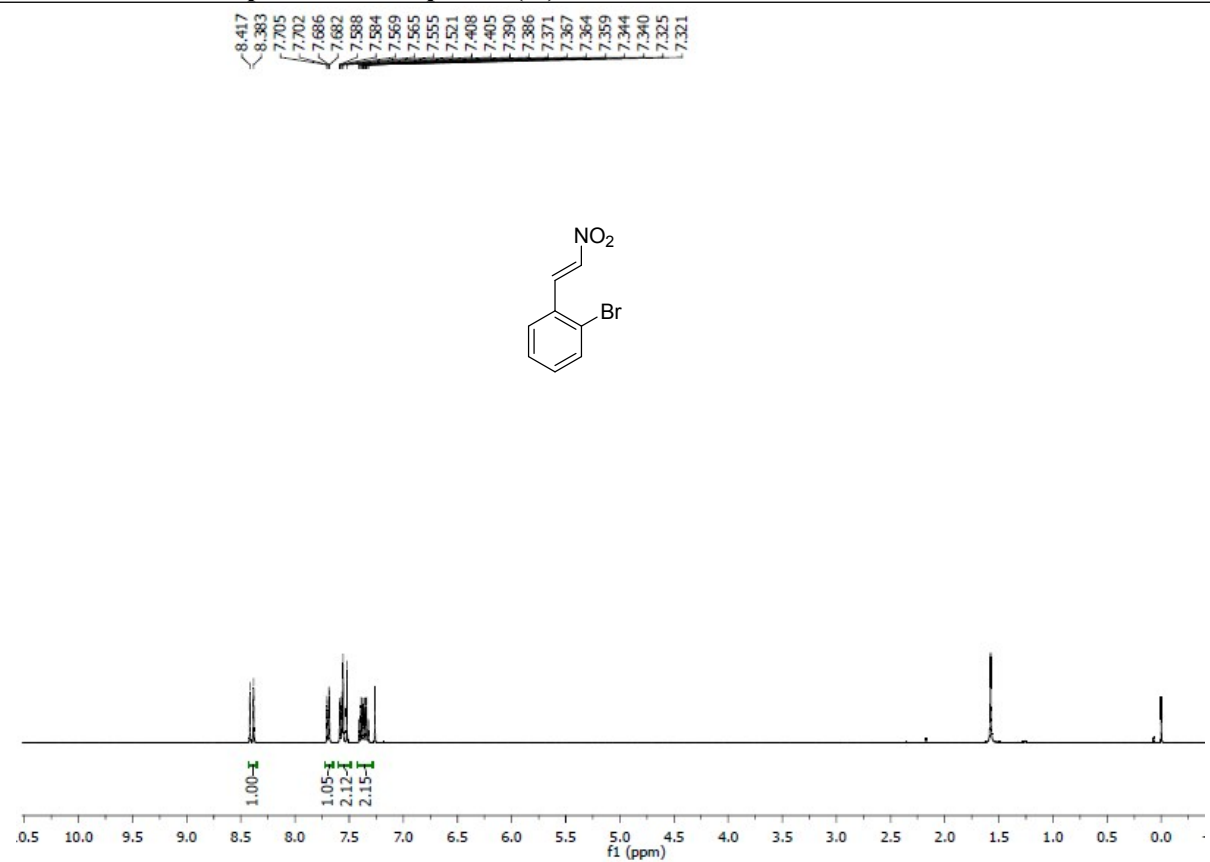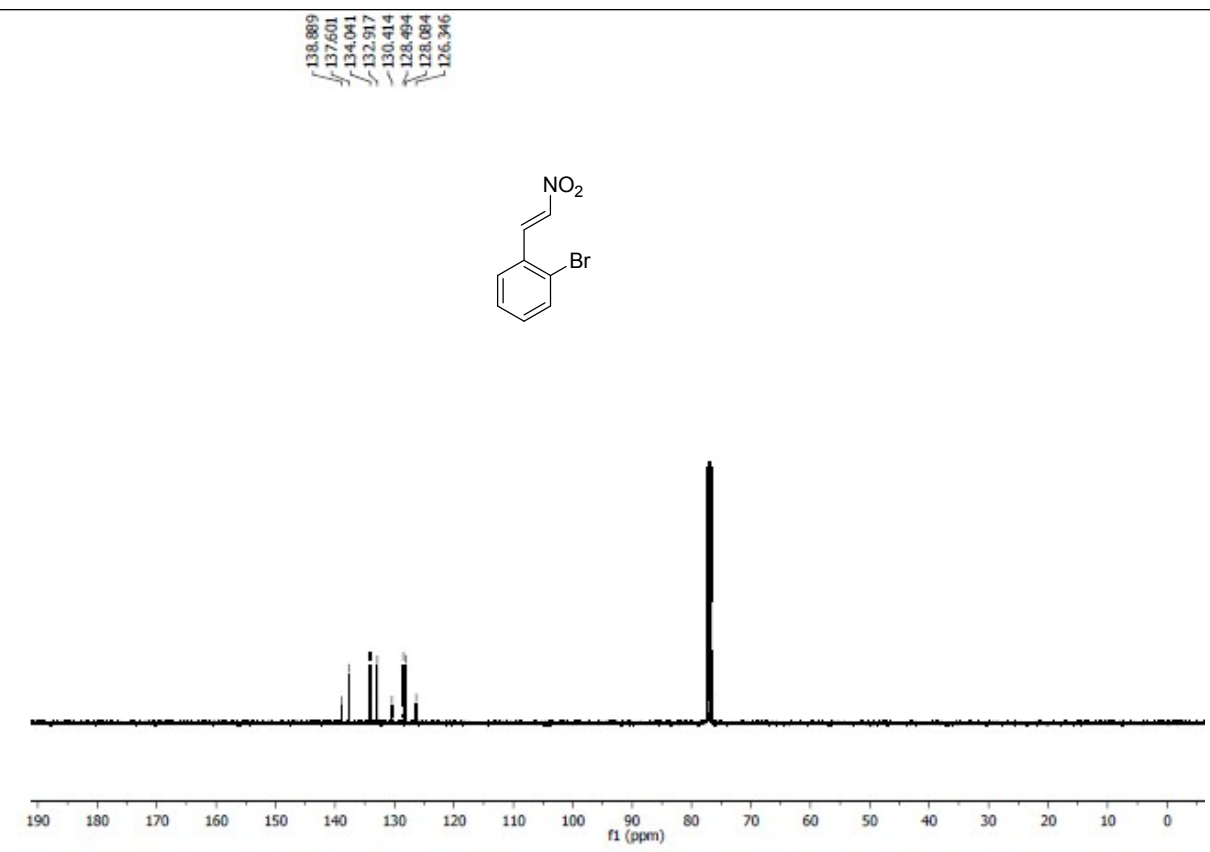

# <sup>1</sup>H Spectra's of Compound (6h & 6g)

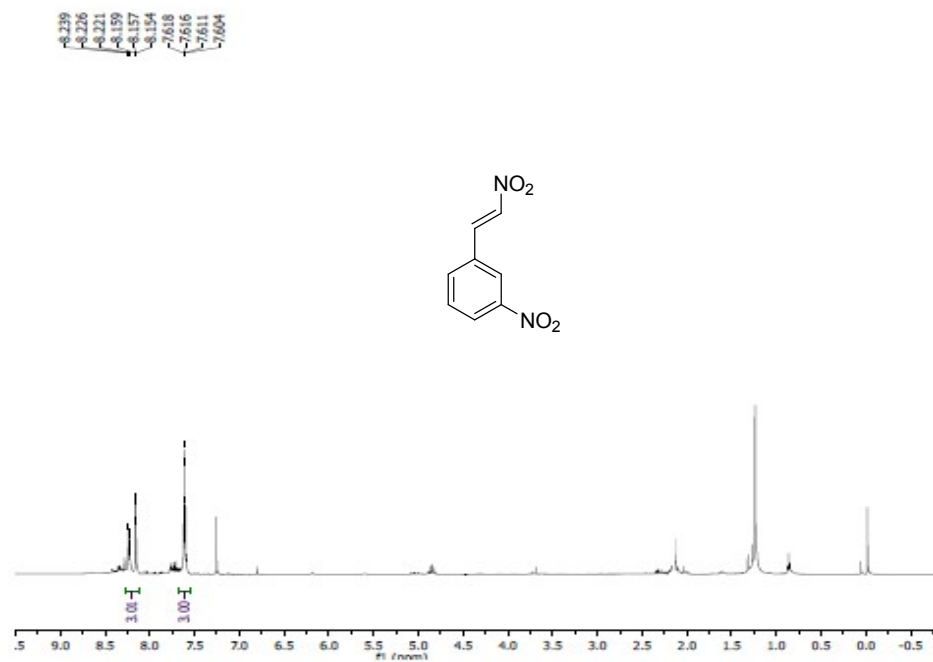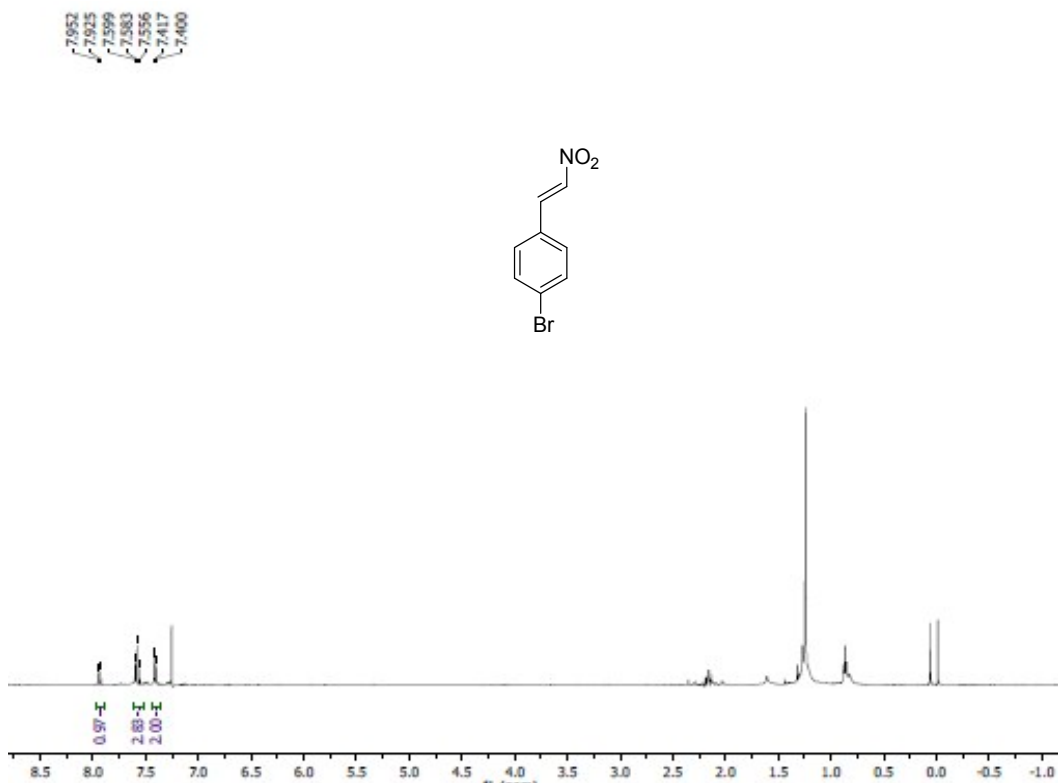

# <sup>1</sup>H and <sup>13</sup>C NMR Spectra of Compound (6i)

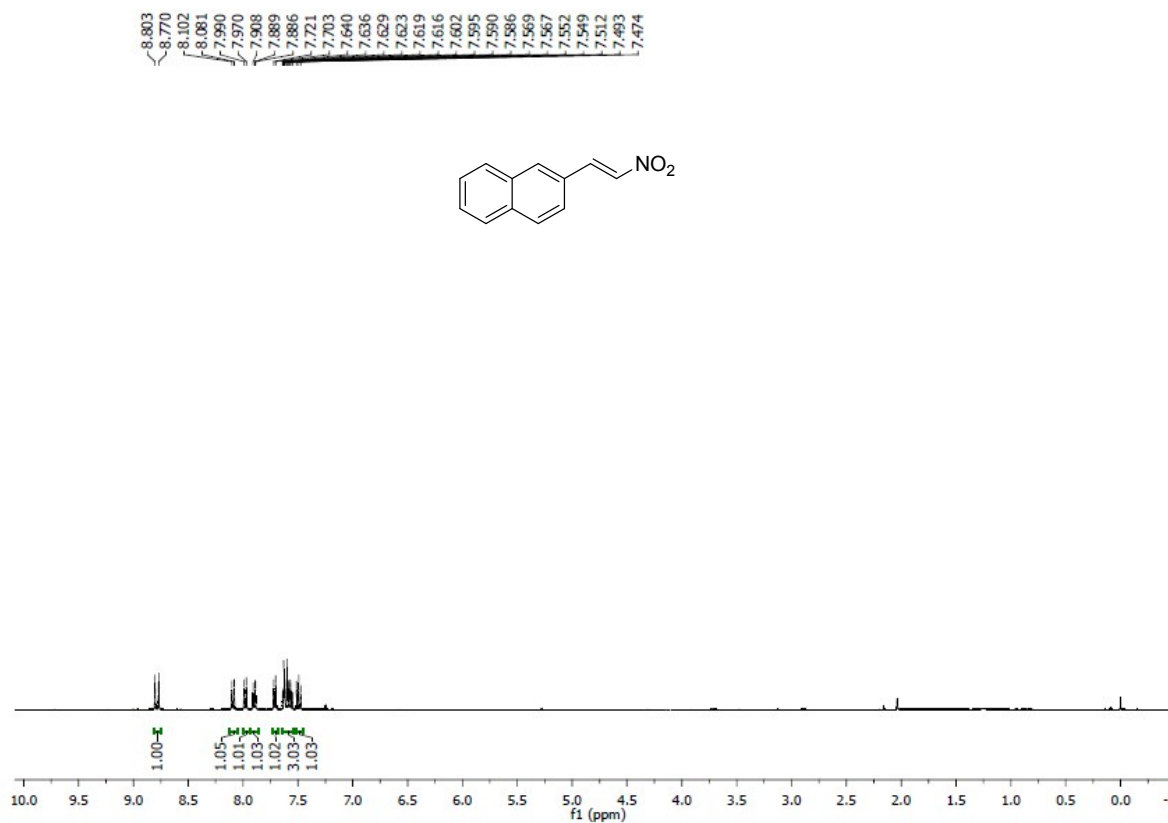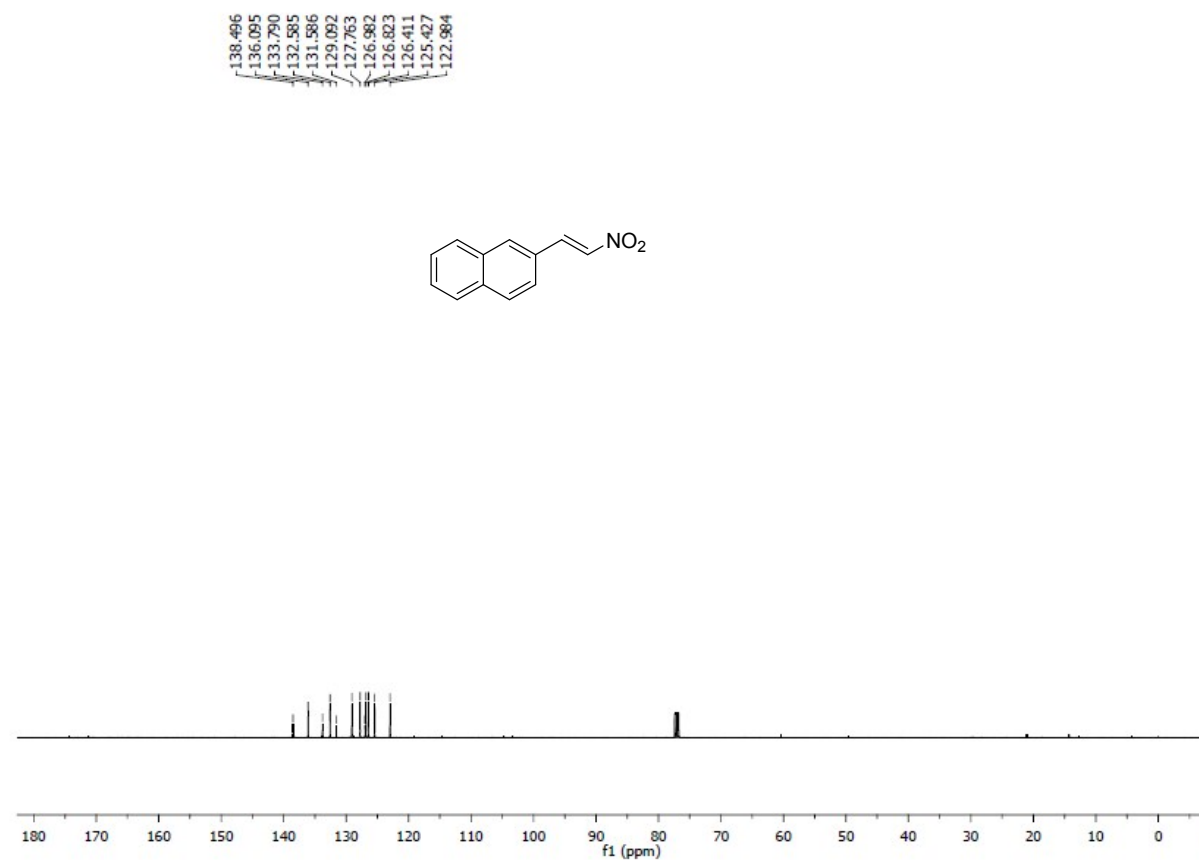

# <sup>1</sup>H and <sup>13</sup>C NMR Spectra of Compound (6j)

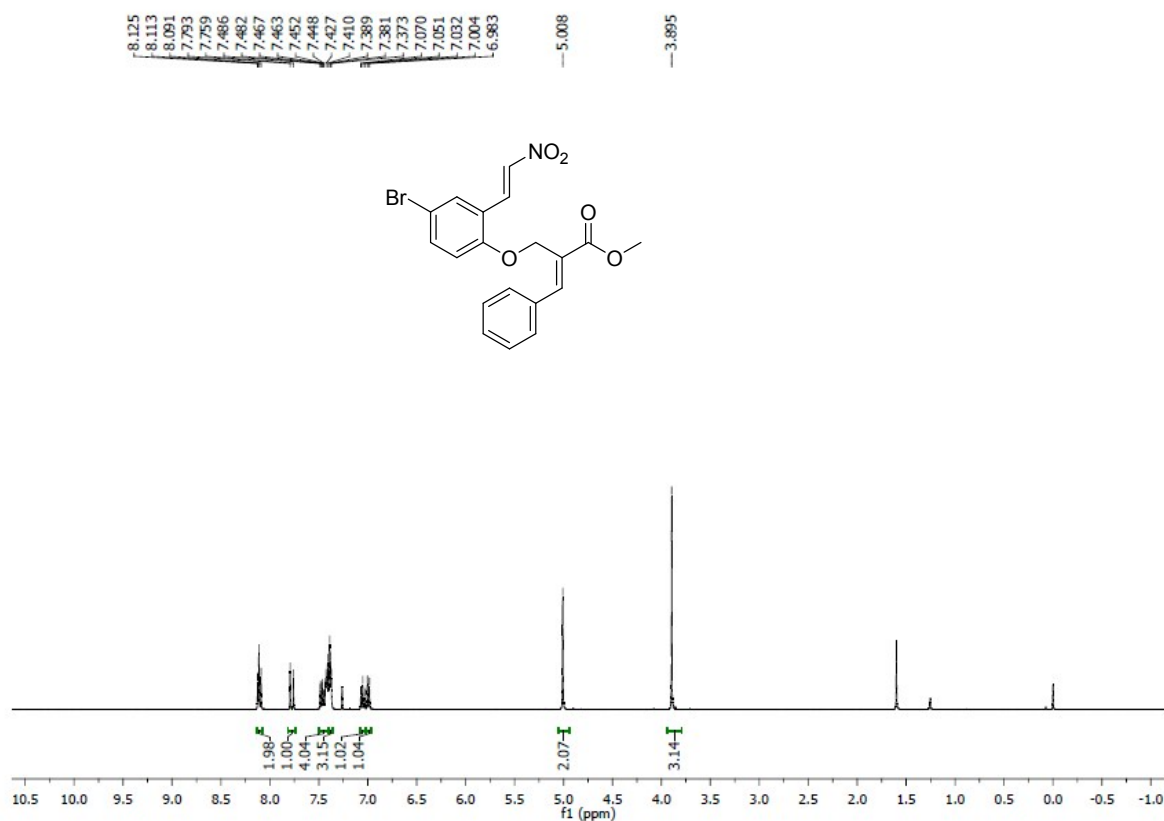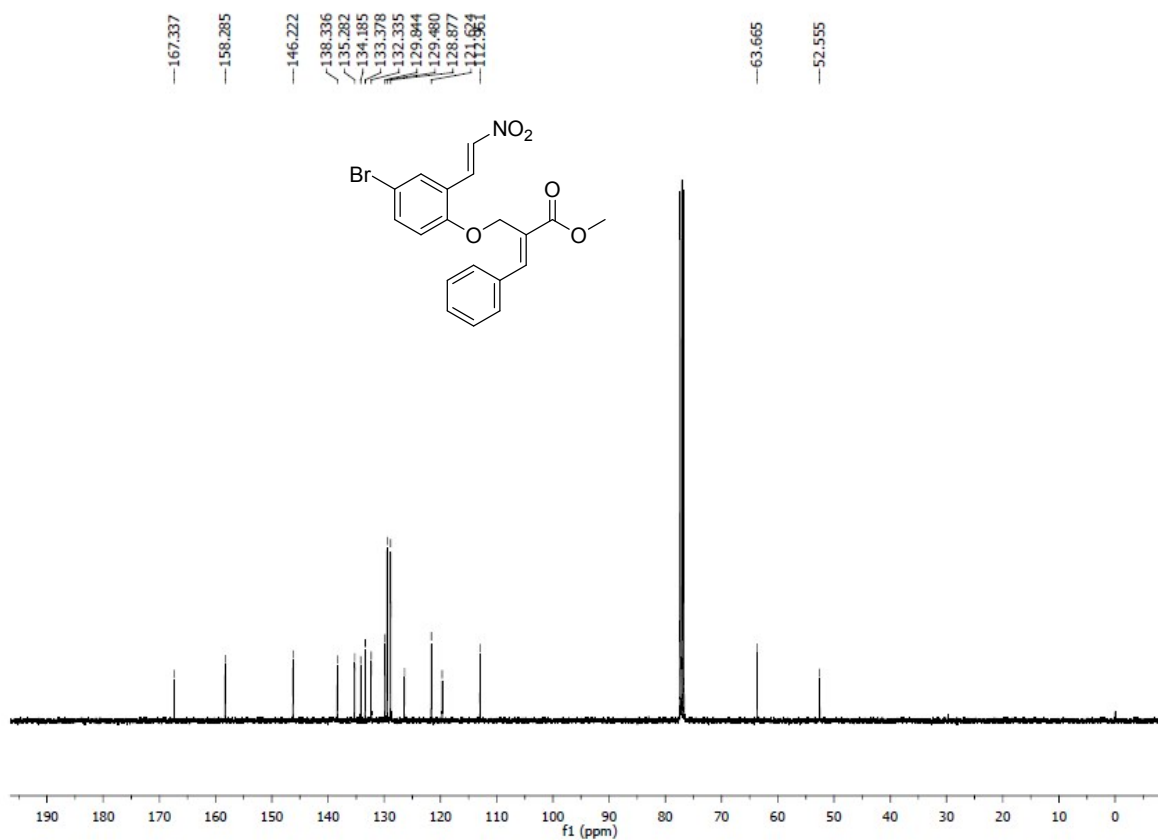

# <sup>1</sup>H and <sup>13</sup>C NMR Spectra of Compound (6k)

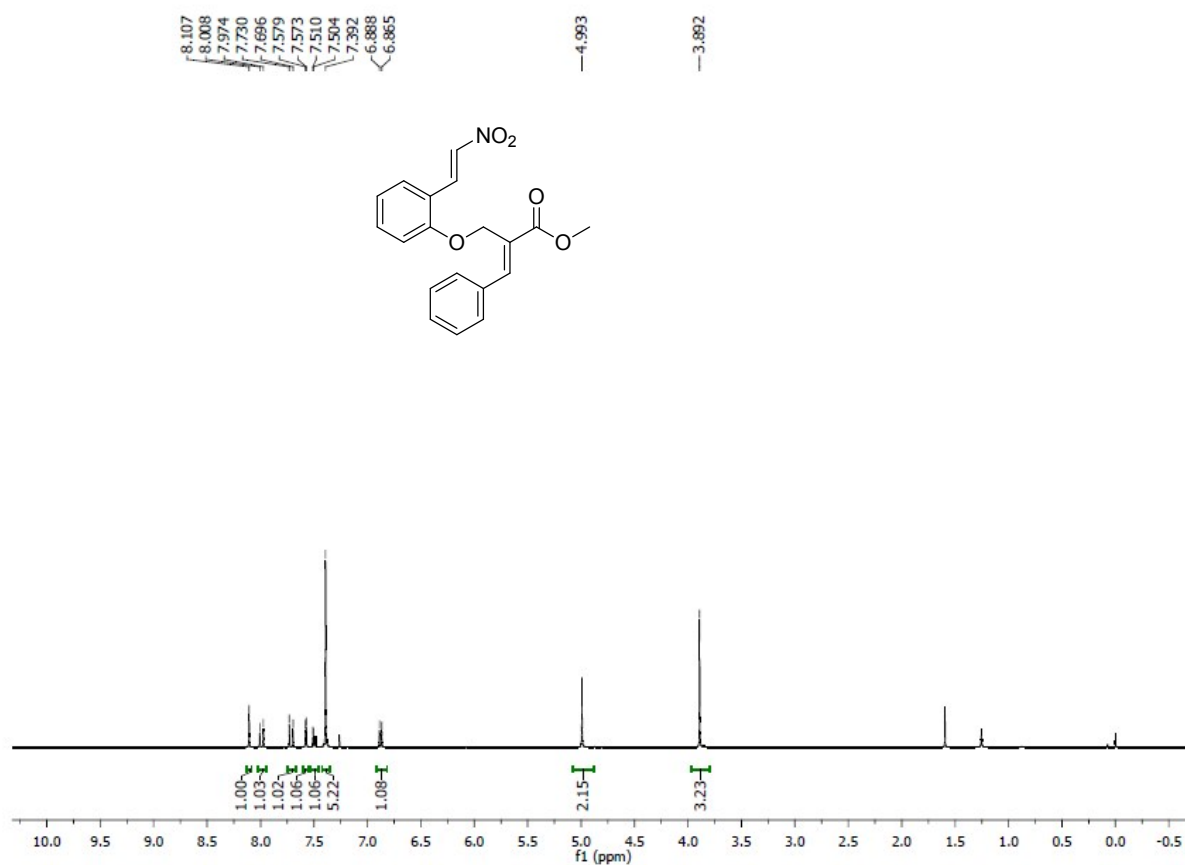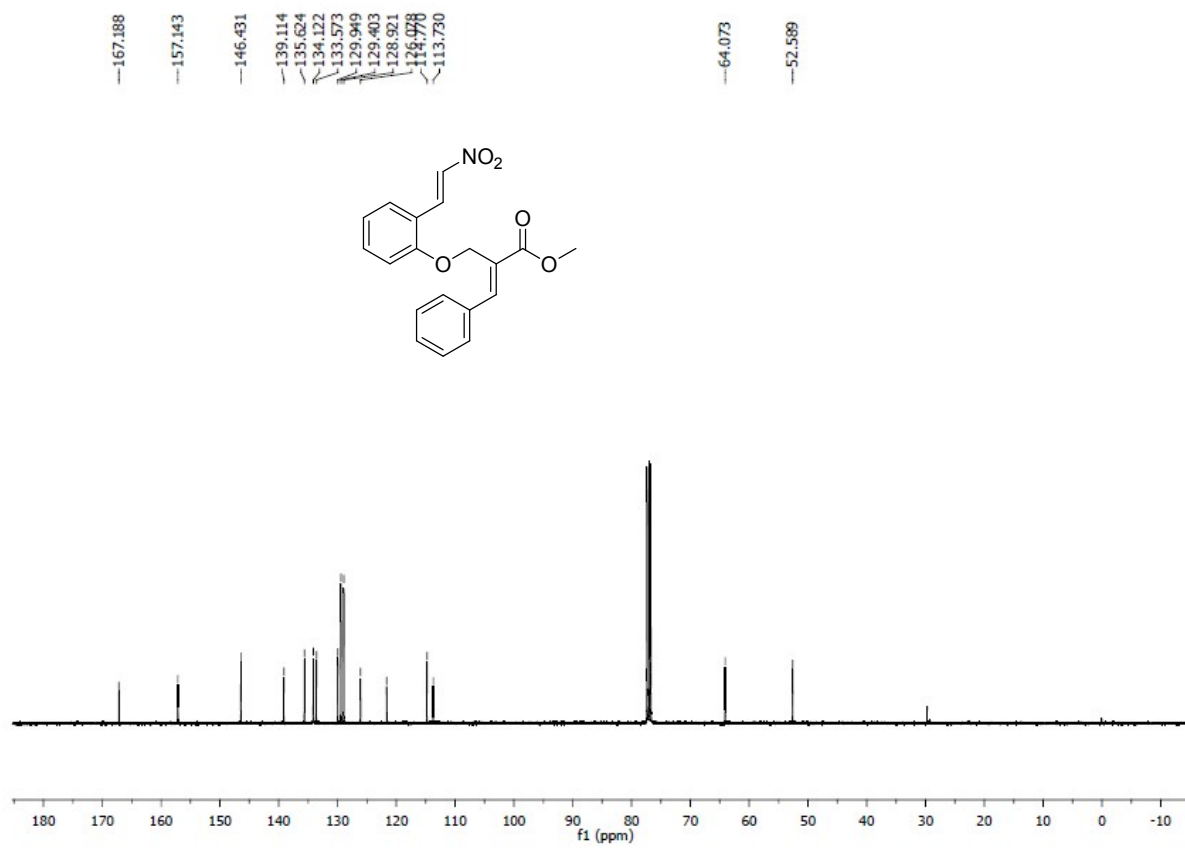

# <sup>1</sup>H and <sup>13</sup>C NMR Spectra of Compound (6I)

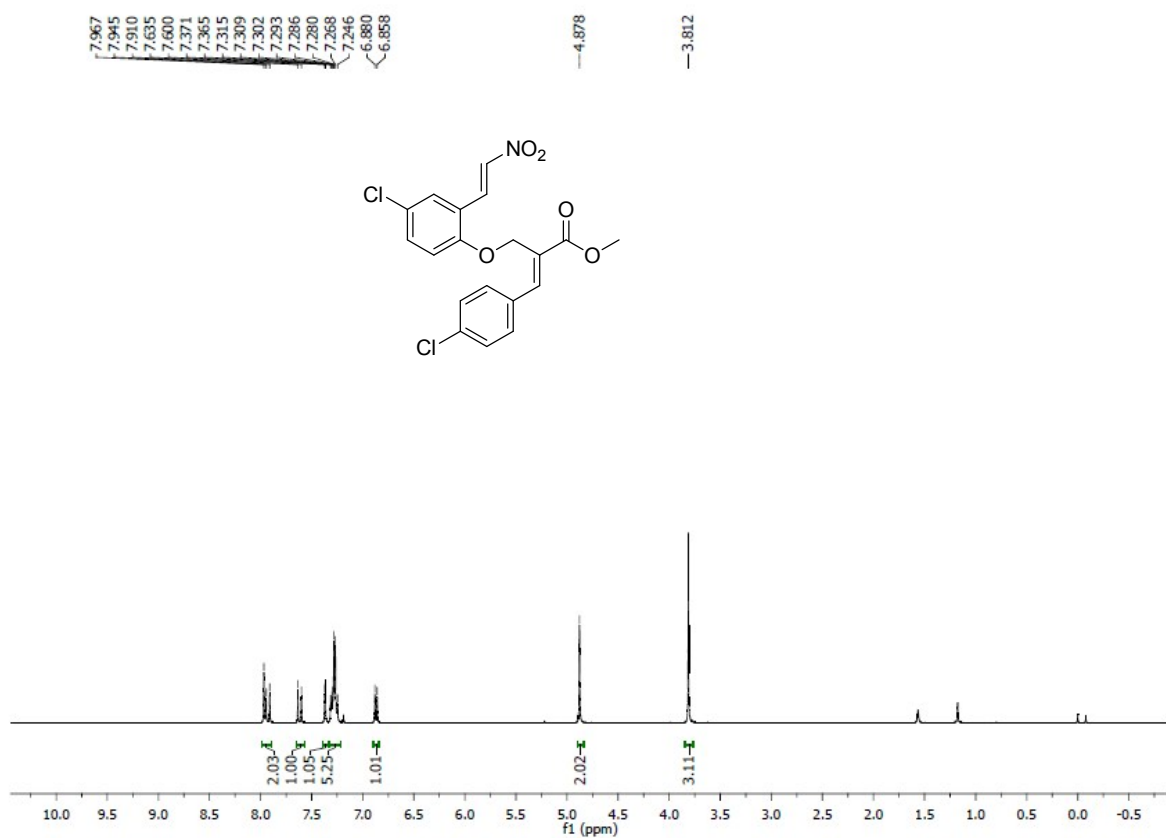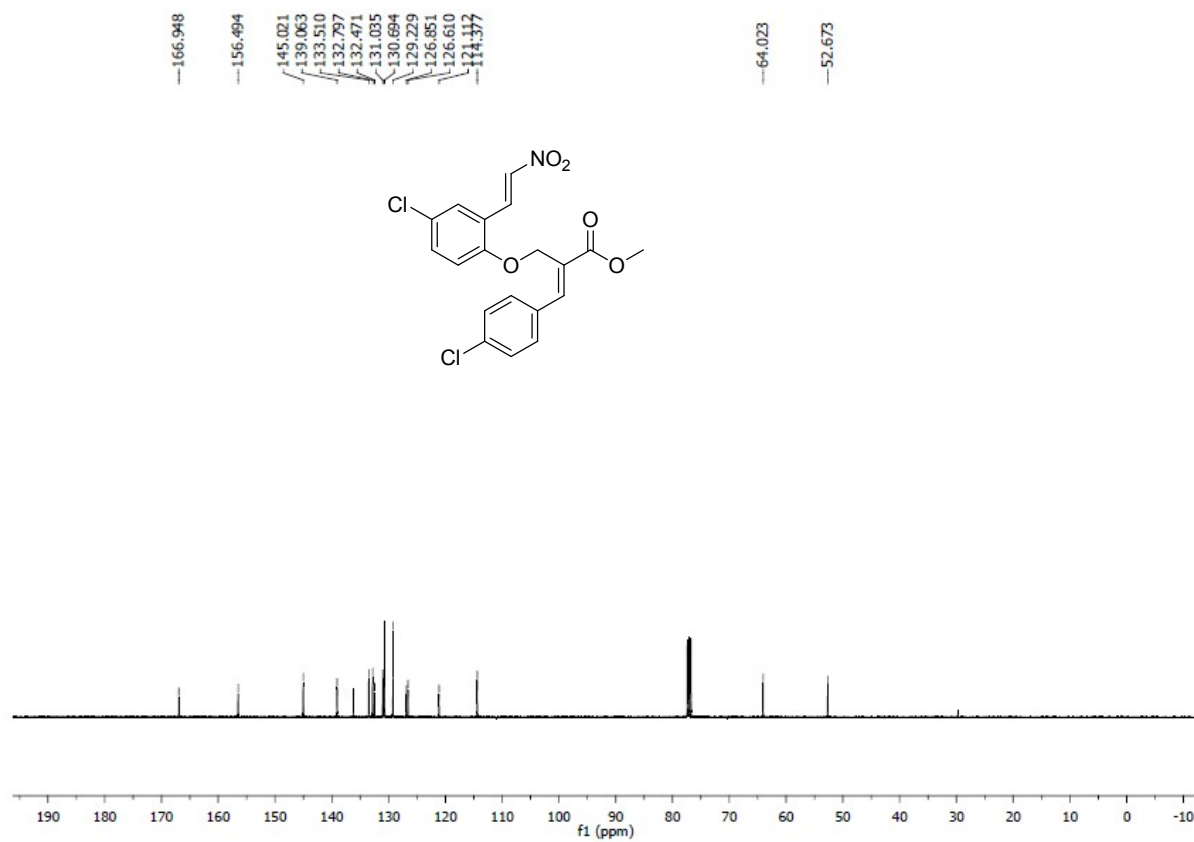



# <sup>1</sup>H and <sup>13</sup>C NMR Spectra of Compound (6m)

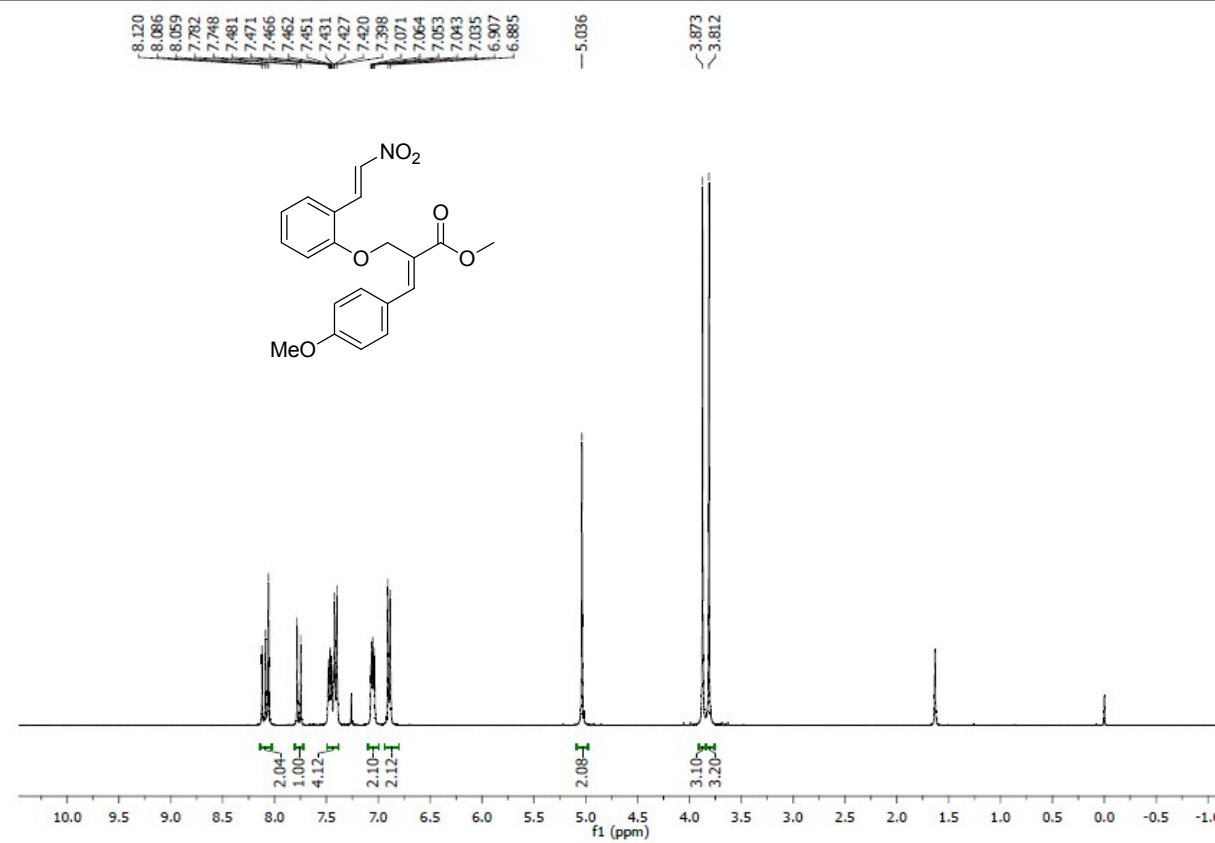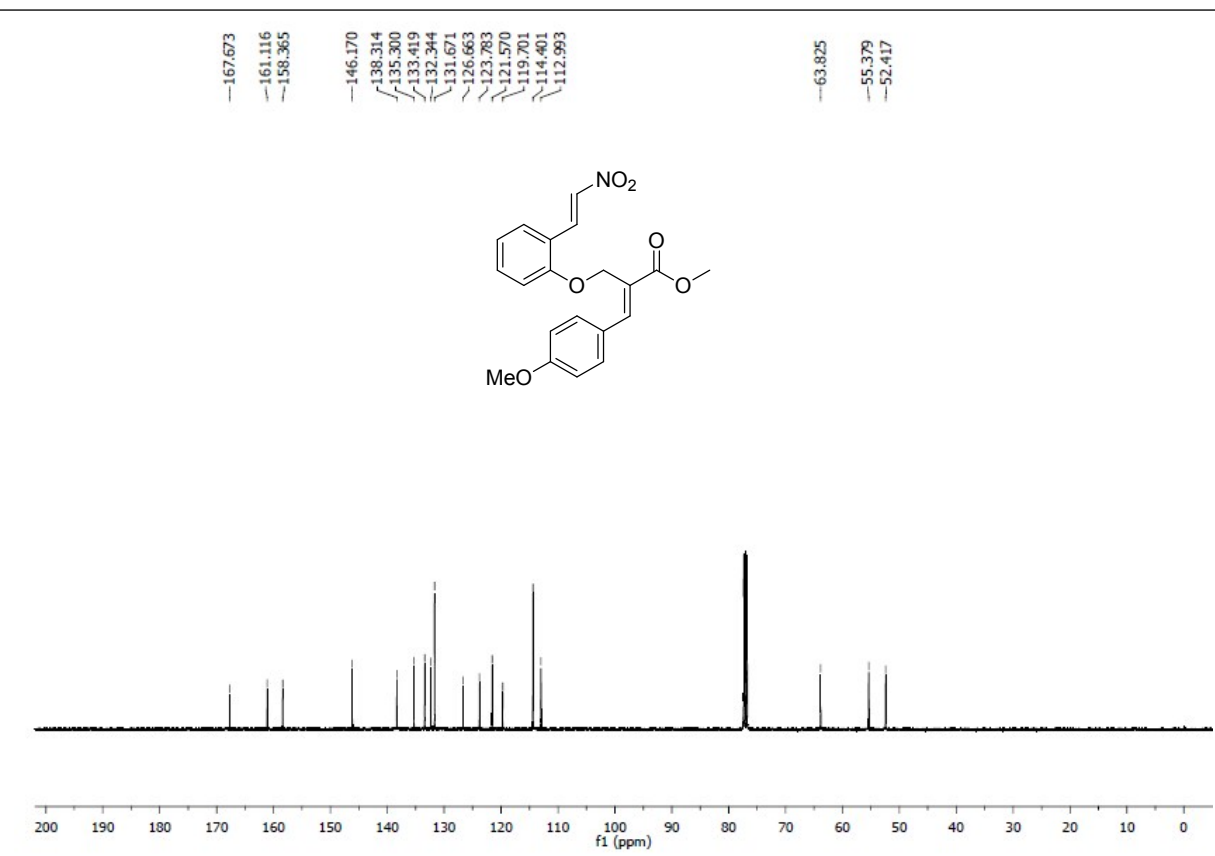

# <sup>1</sup>H and <sup>13</sup>C NMR Spectra of Compound (6n)

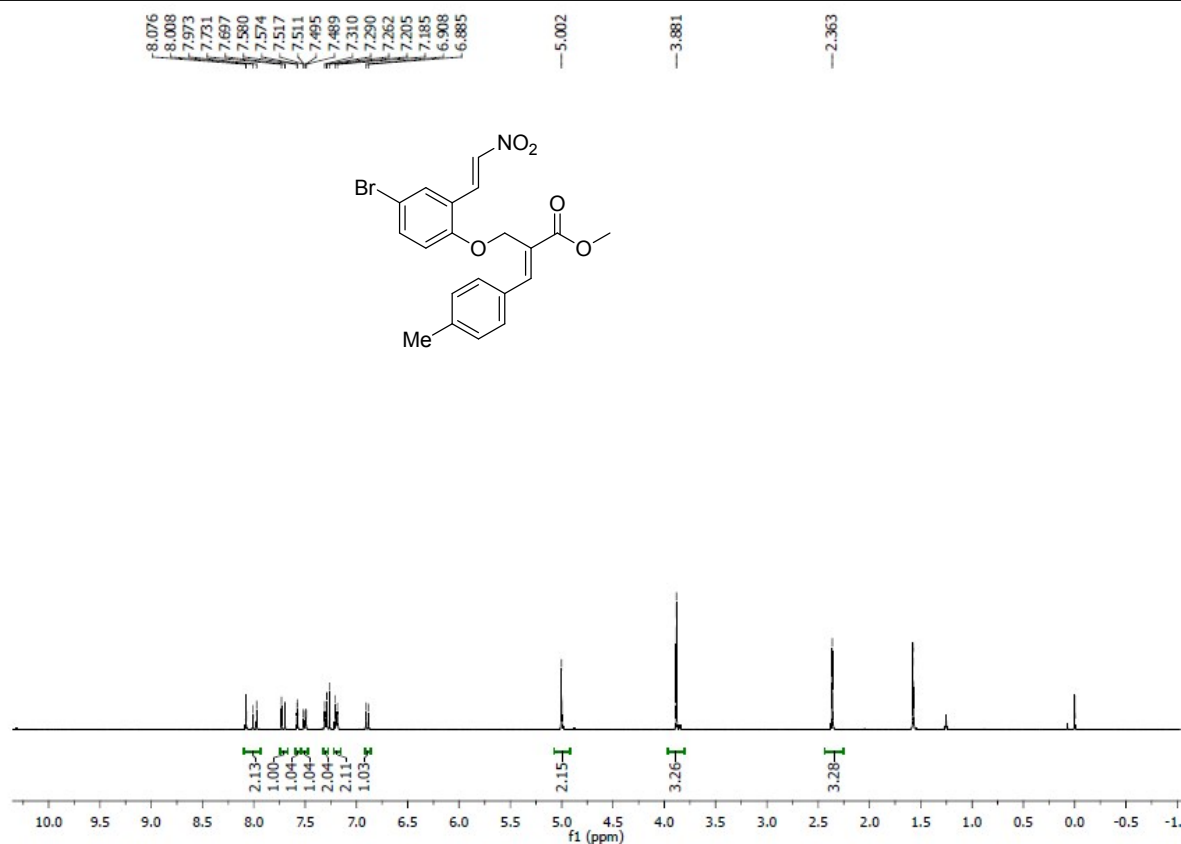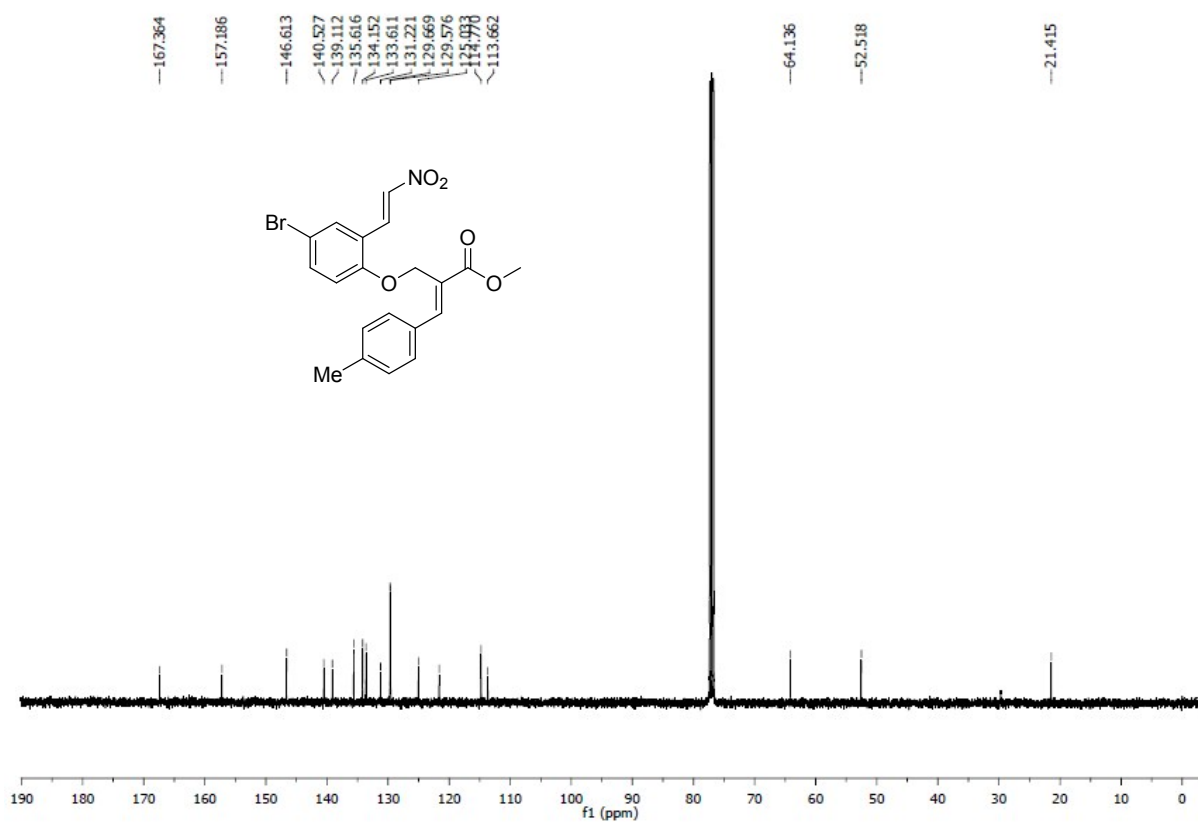

# <sup>1</sup>H and <sup>13</sup>C NMR Spectra of Compound (60)

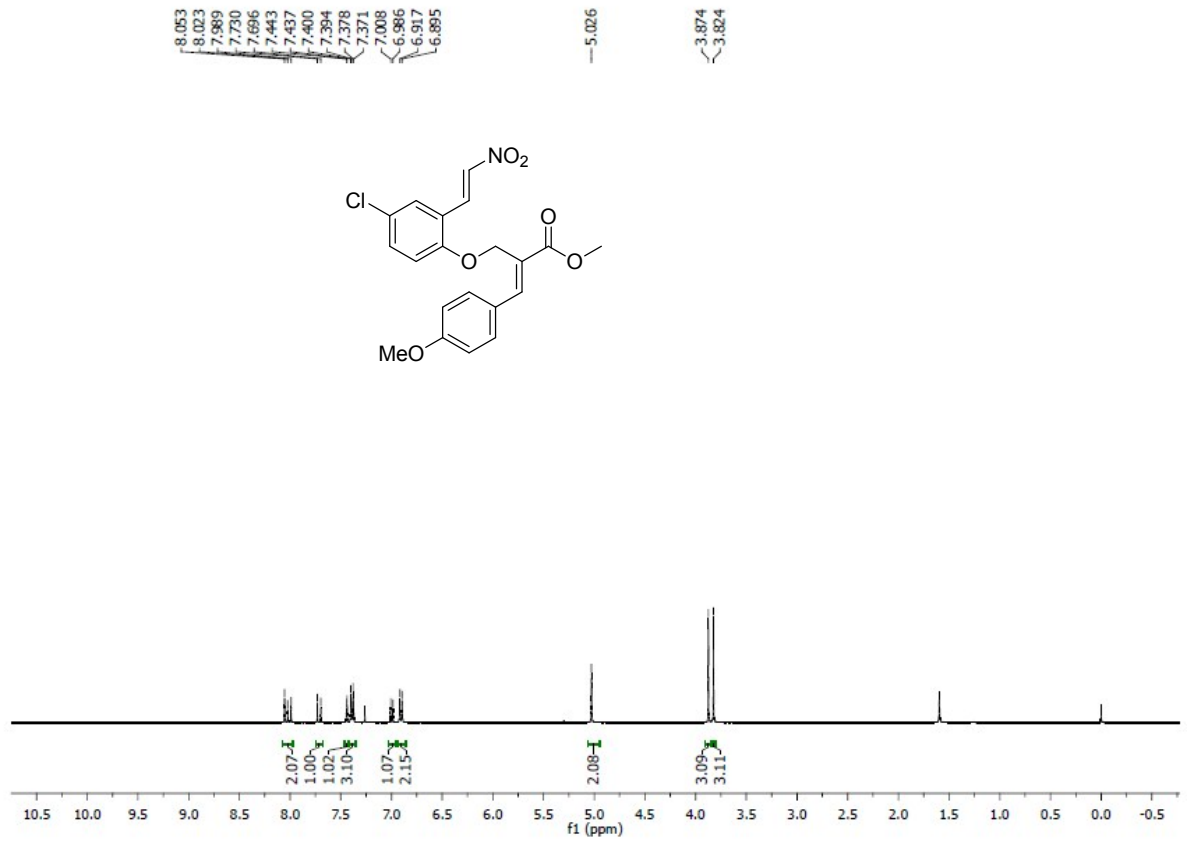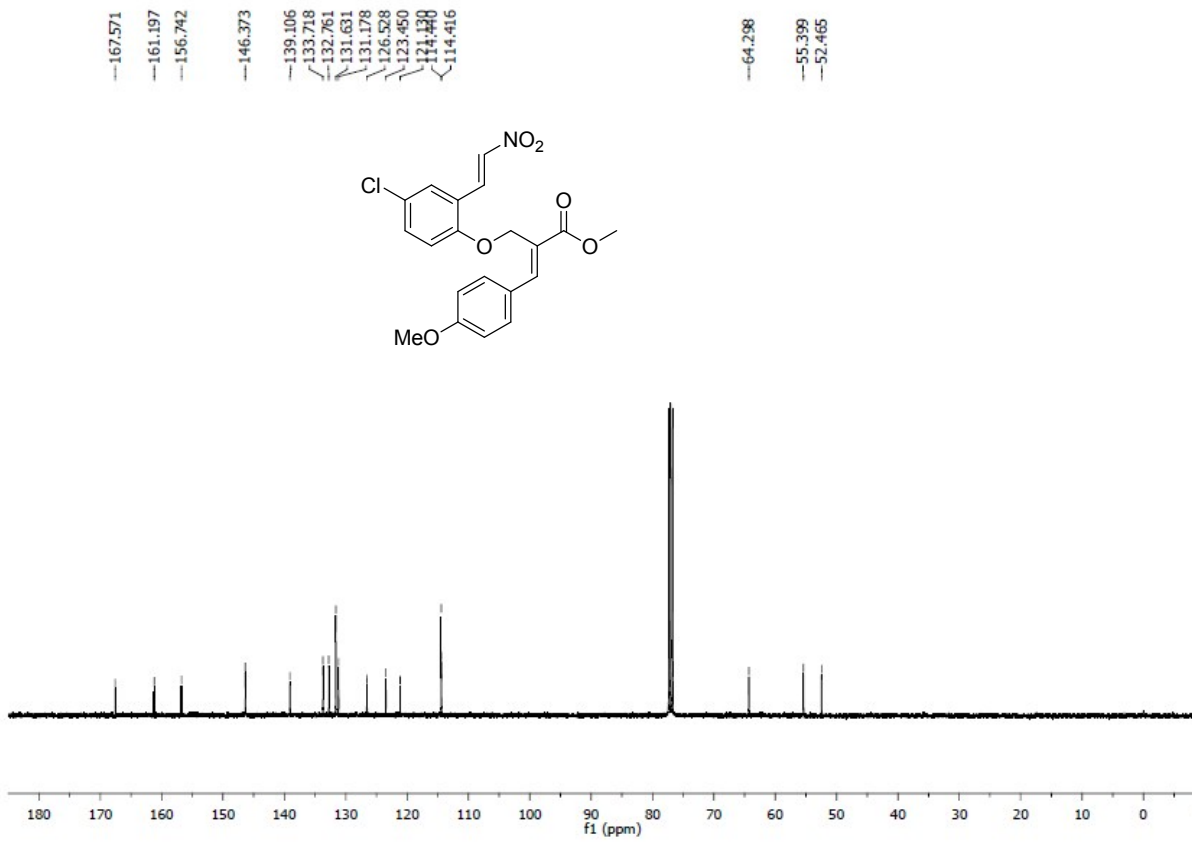

# <sup>1</sup>H and <sup>13</sup>C NMR Spectra of Compound (6p)

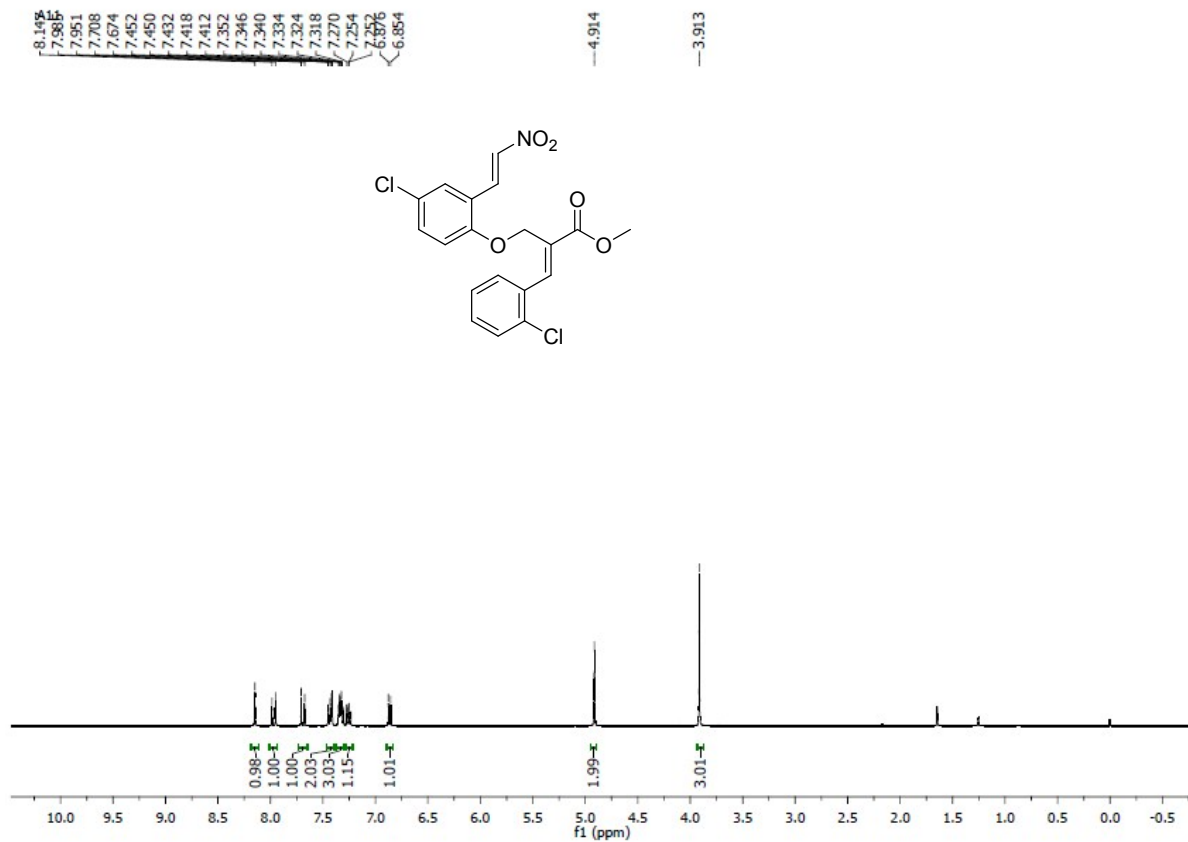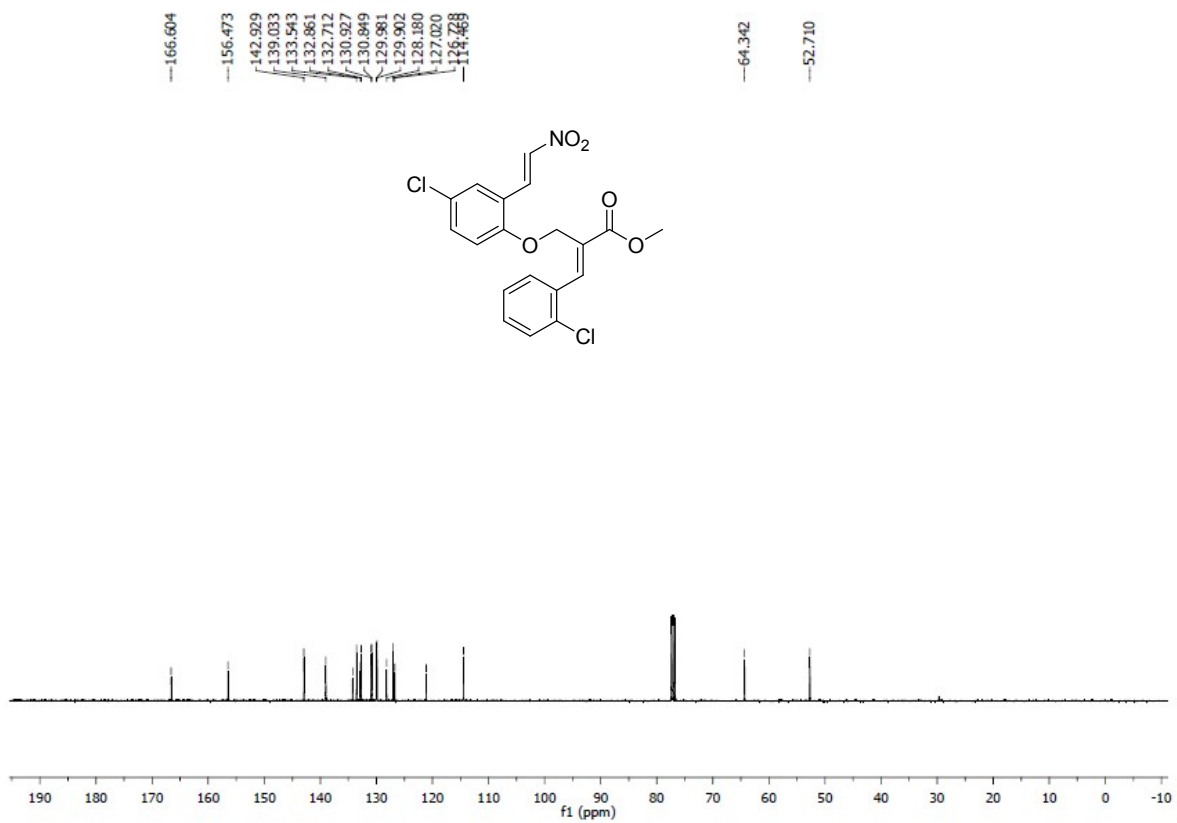

# <sup>1</sup>H and <sup>13</sup>C NMR Spectra of Compound (6q)

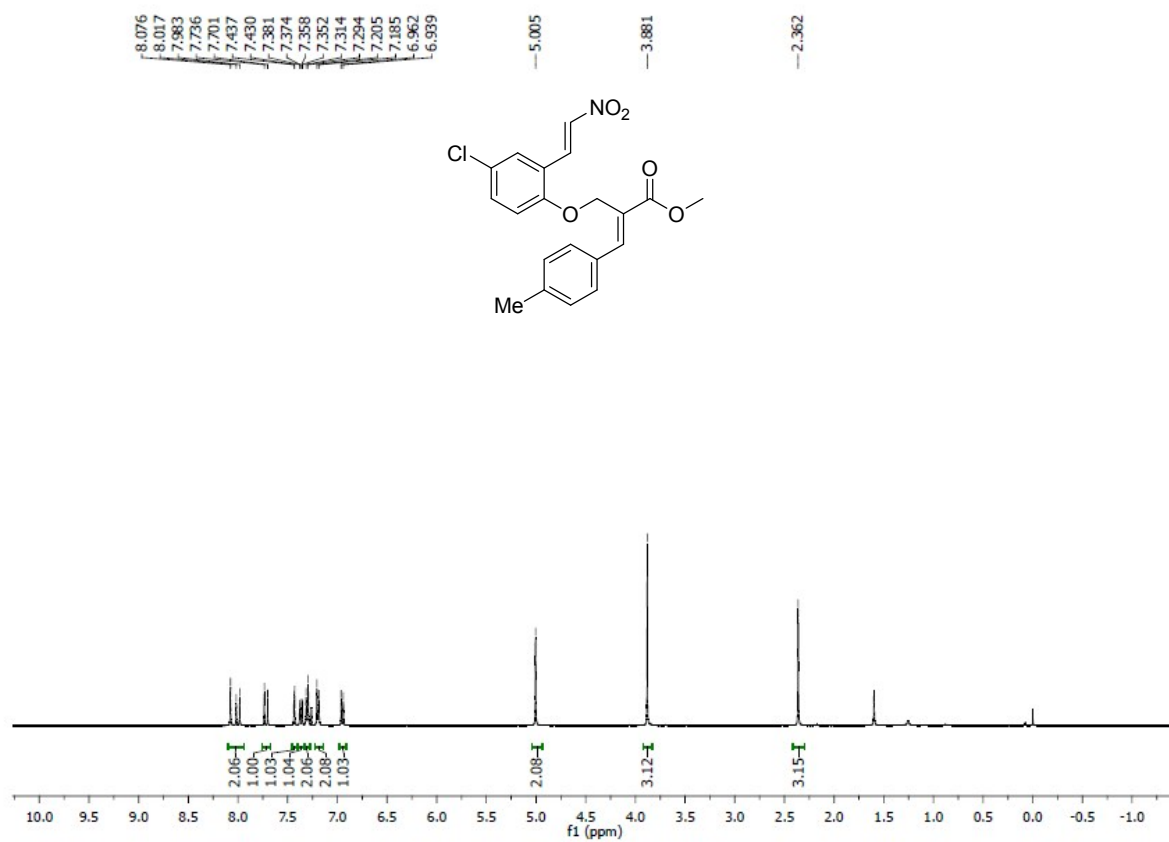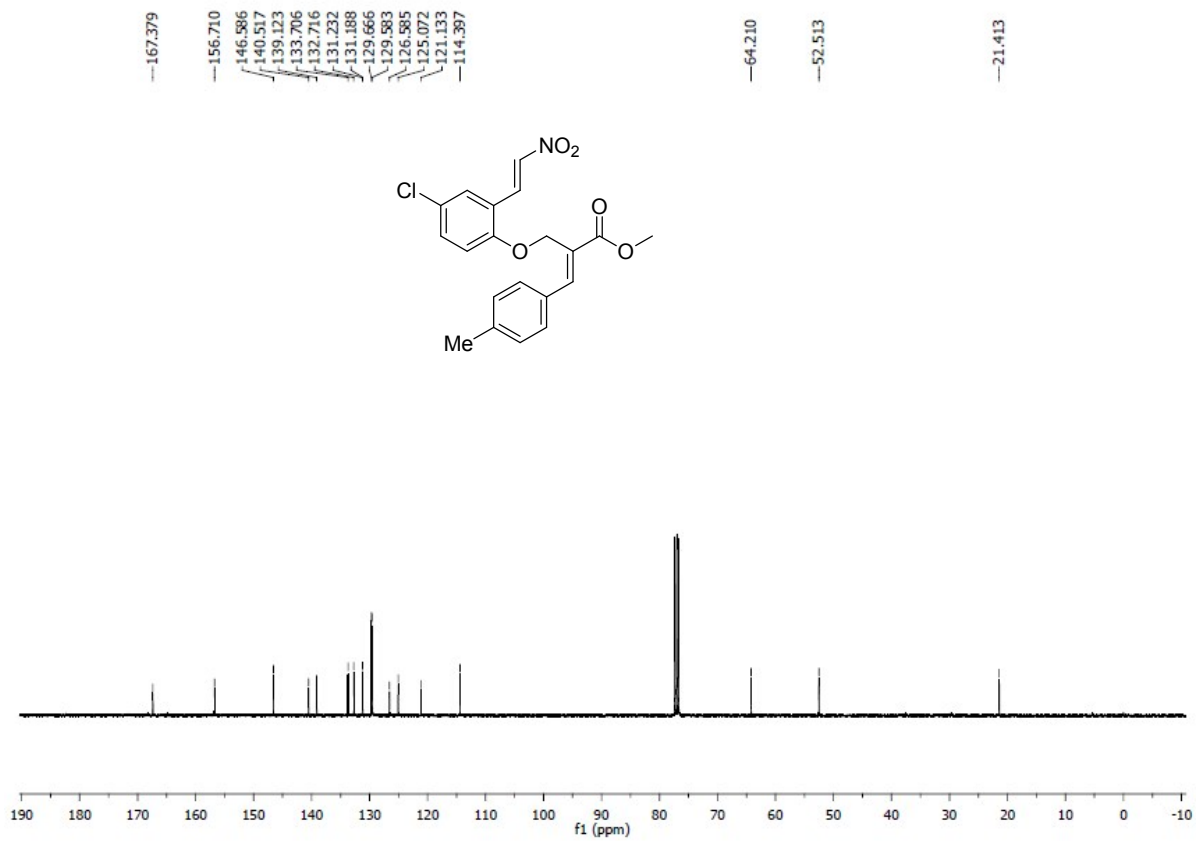

# <sup>1</sup>H and <sup>13</sup>C NMR Spectra of Compound (6r)

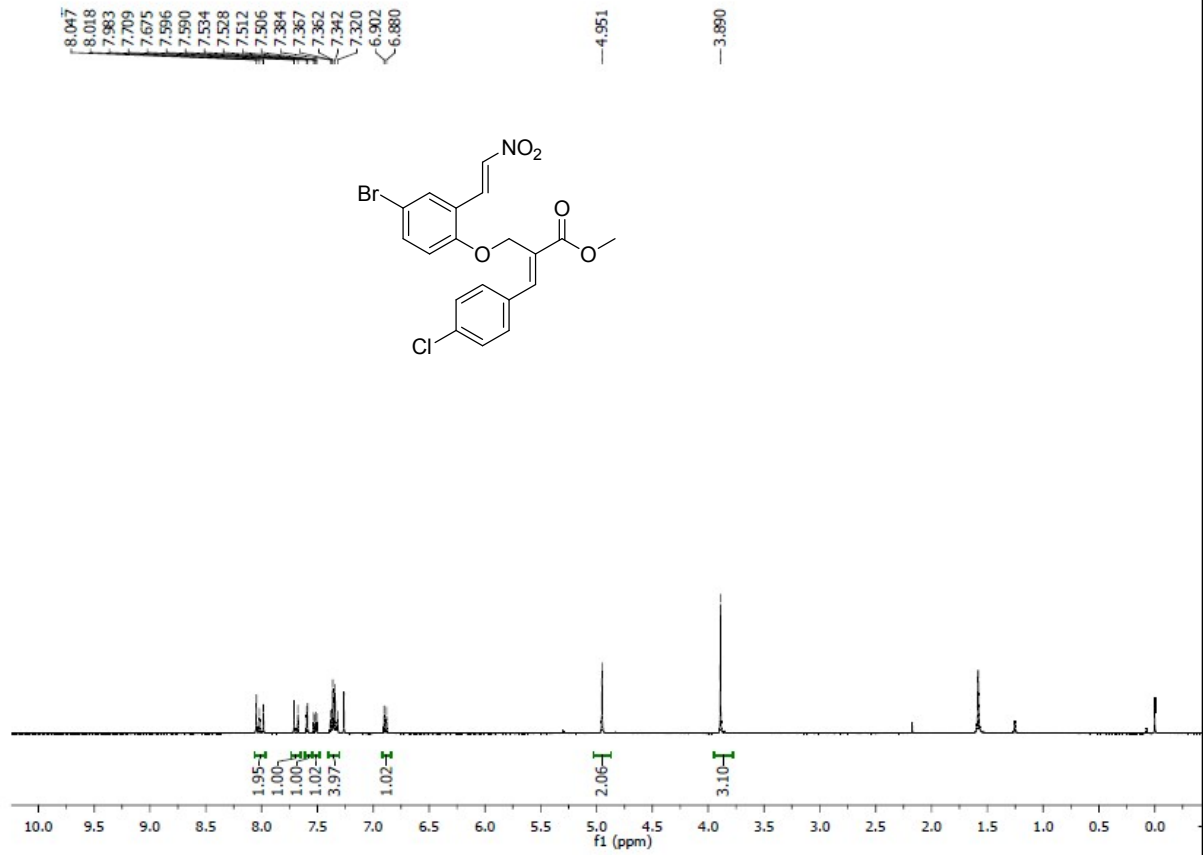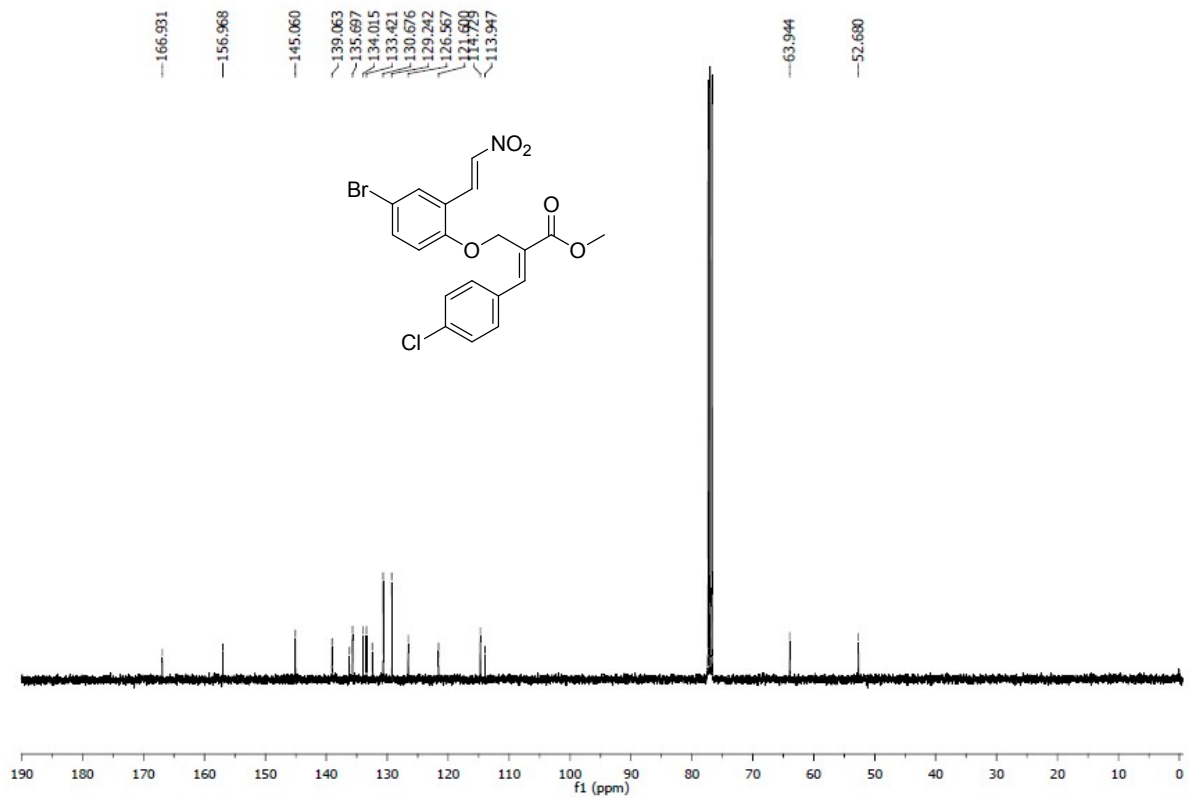

# <sup>1</sup>H and <sup>13</sup>C NMR Spectra of Compound (6s)

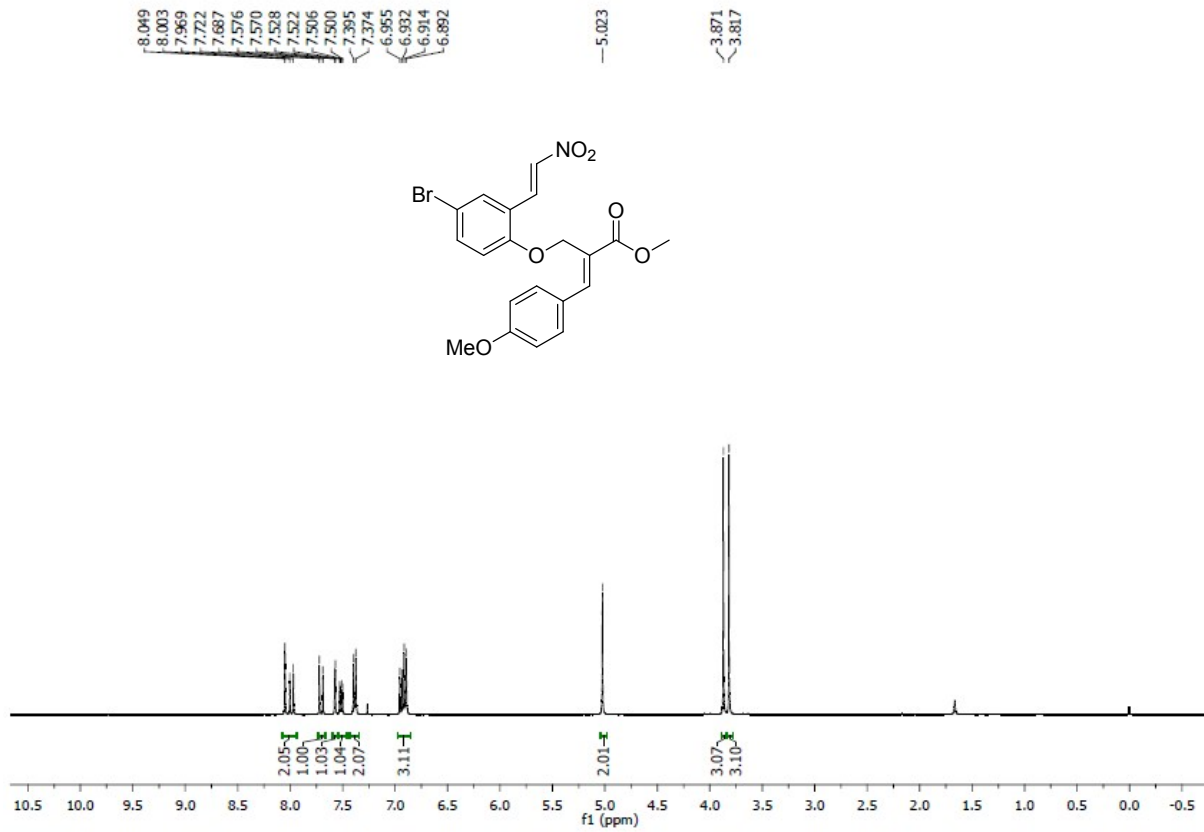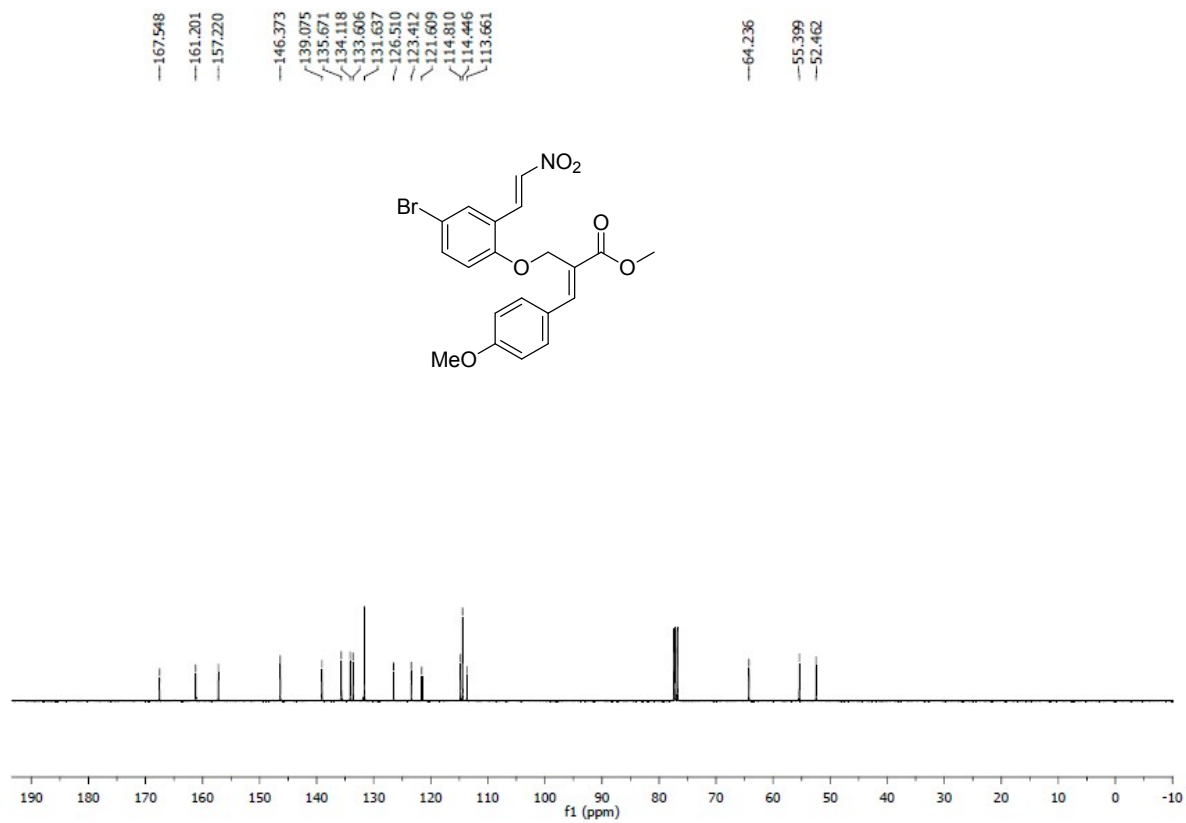

# <sup>1</sup>H and <sup>13</sup>C NMR Spectra of Compound (6t)

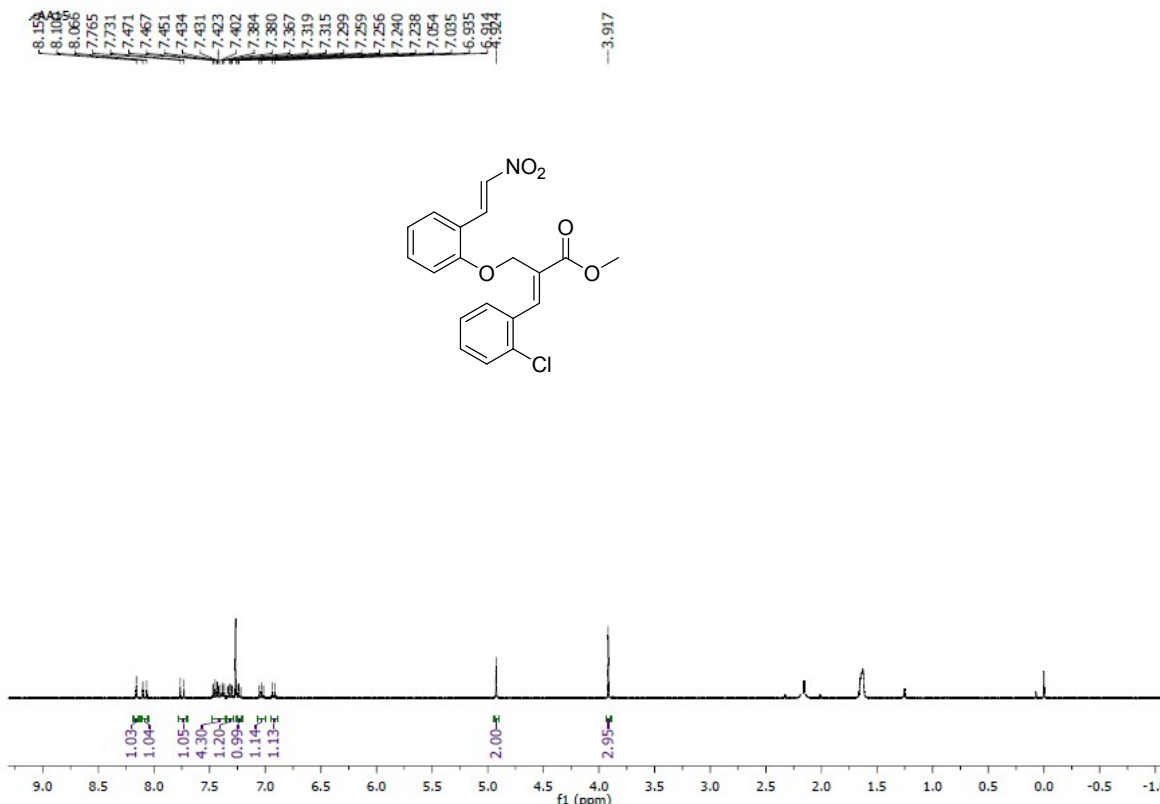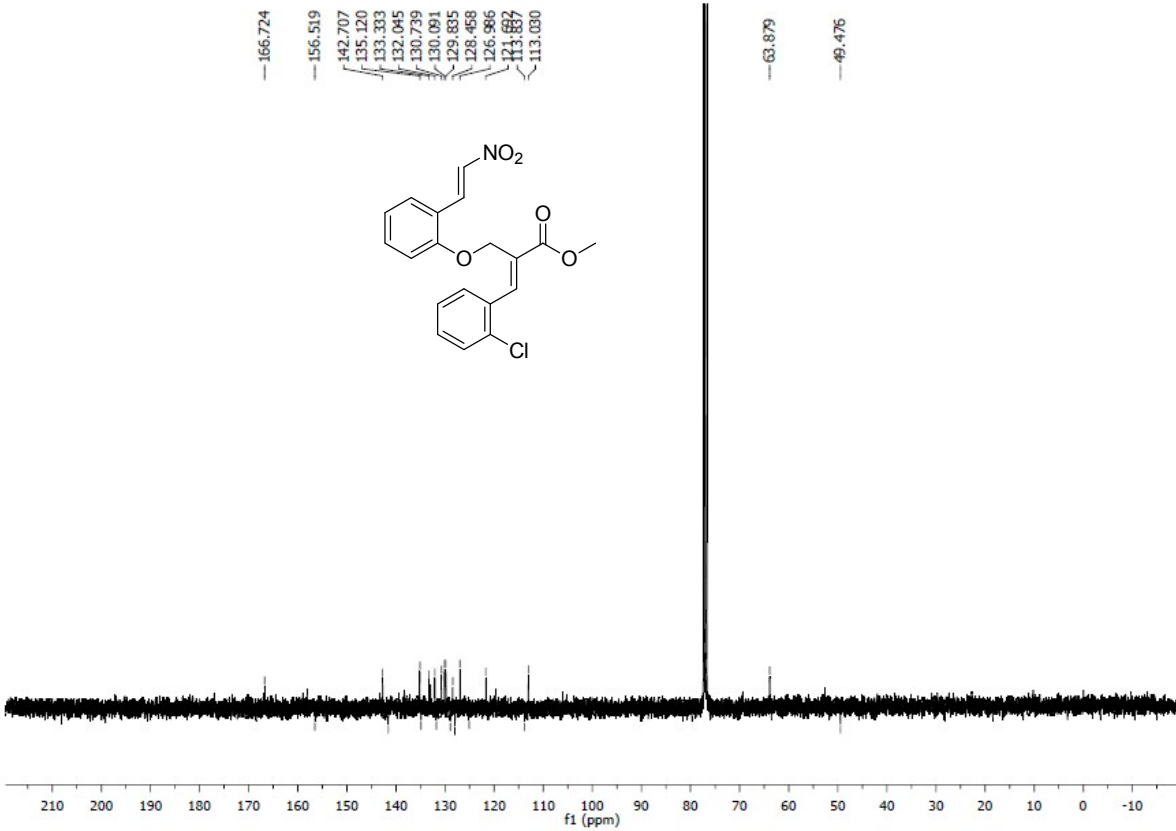



# <sup>1</sup>H and <sup>13</sup>C NMR Spectra of Compound (6u)

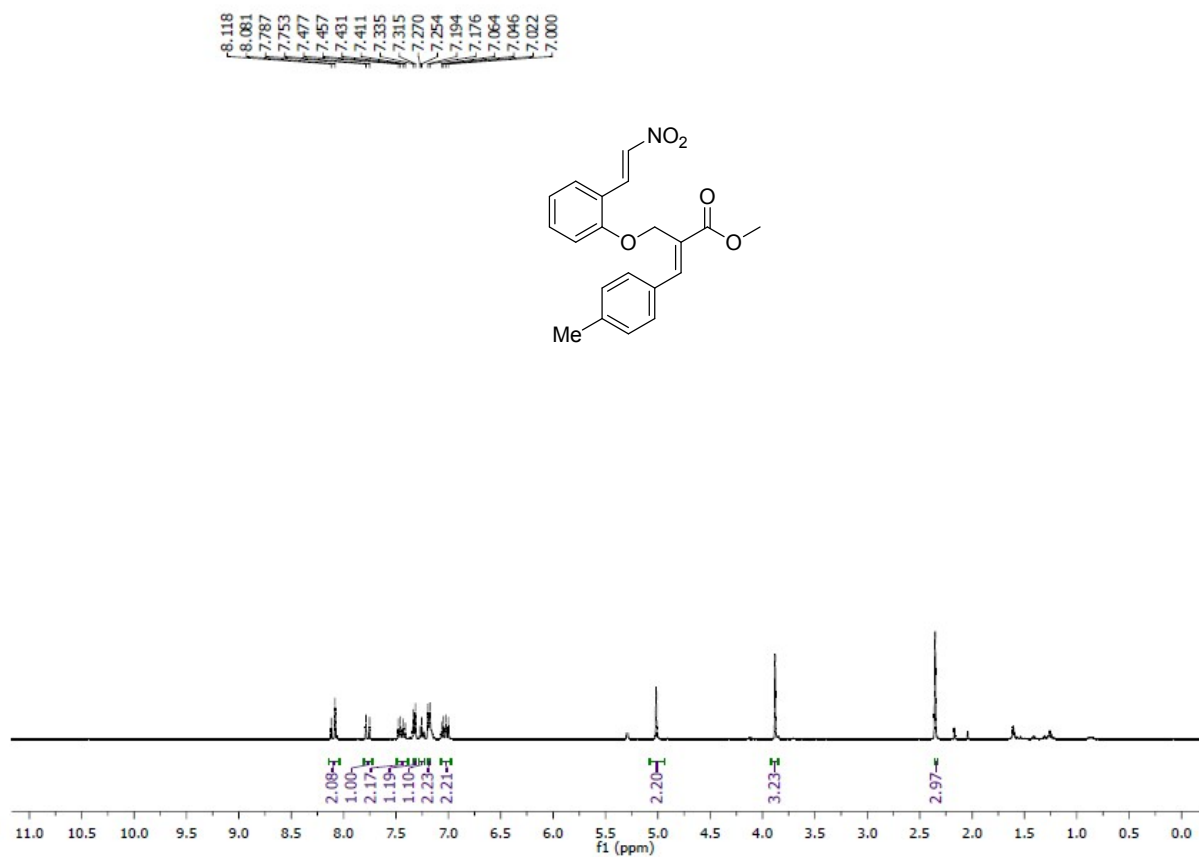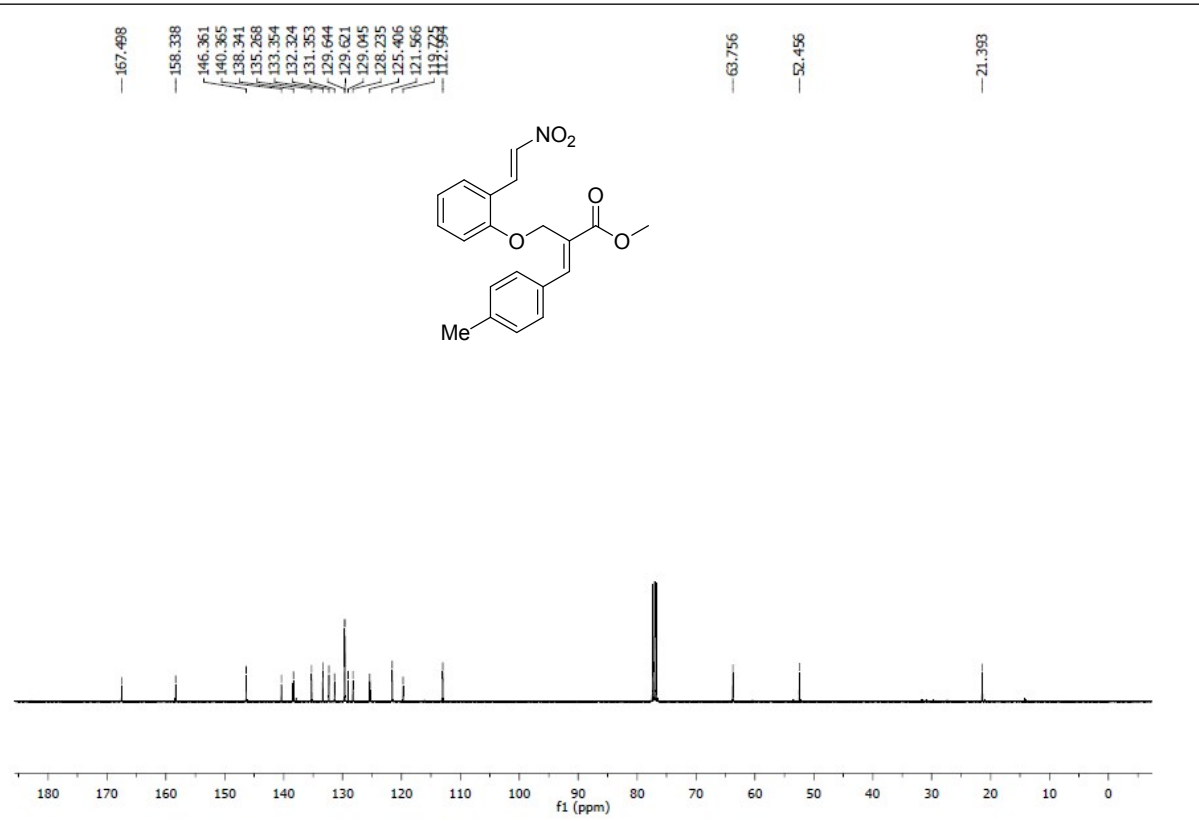

# <sup>1</sup>H and <sup>13</sup>C NMR Spectra of Compound (7v)

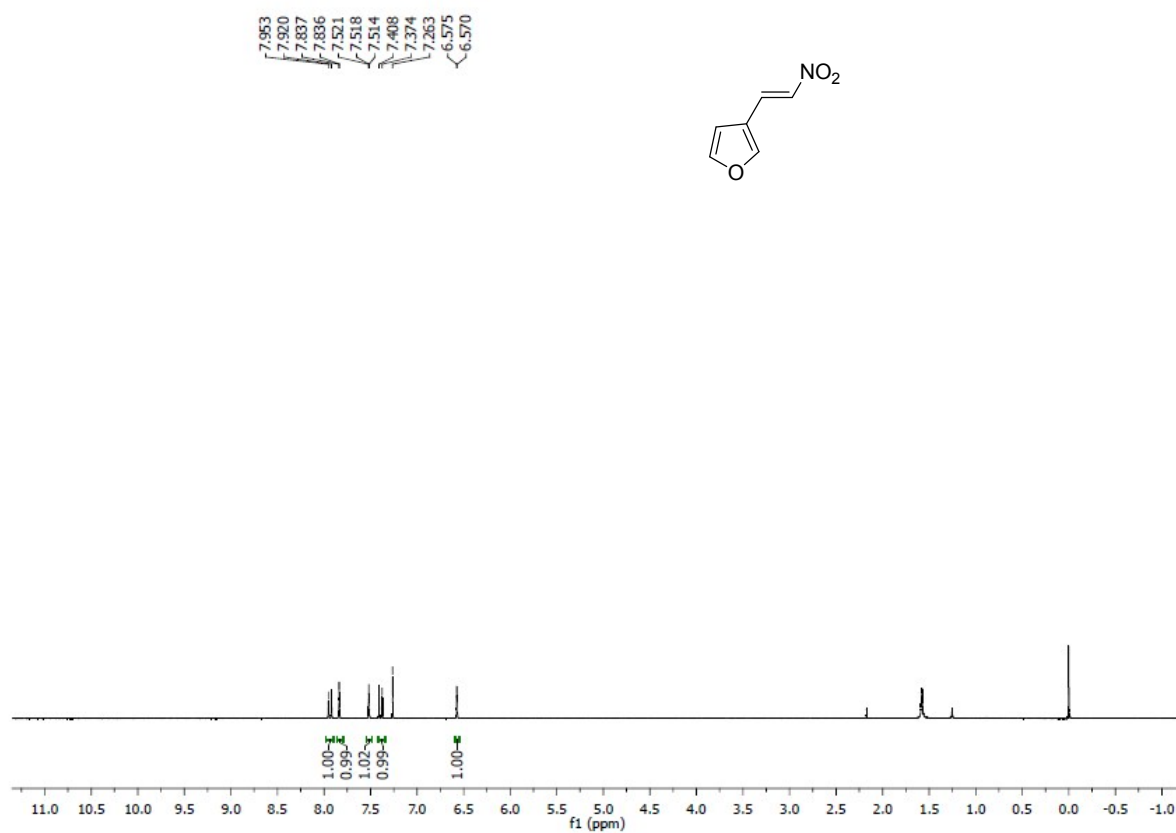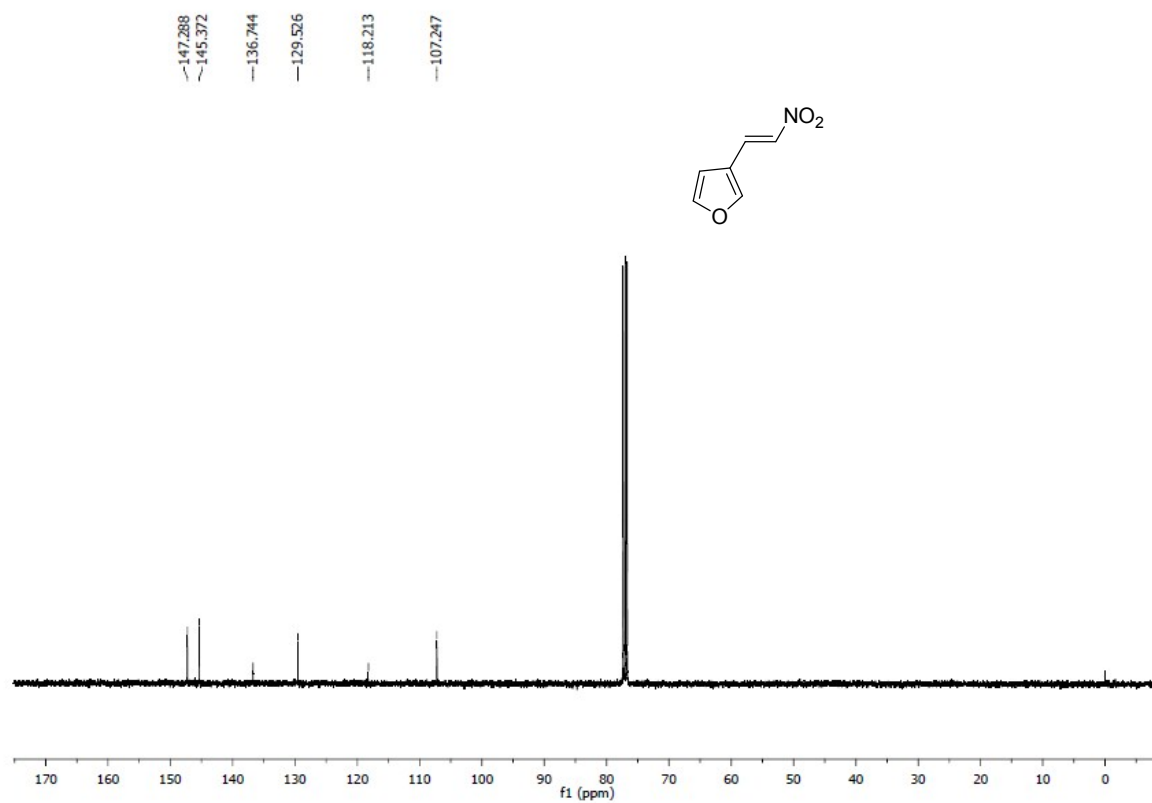

# <sup>1</sup>H and <sup>13</sup>C NMR Spectra of Compound (7w)

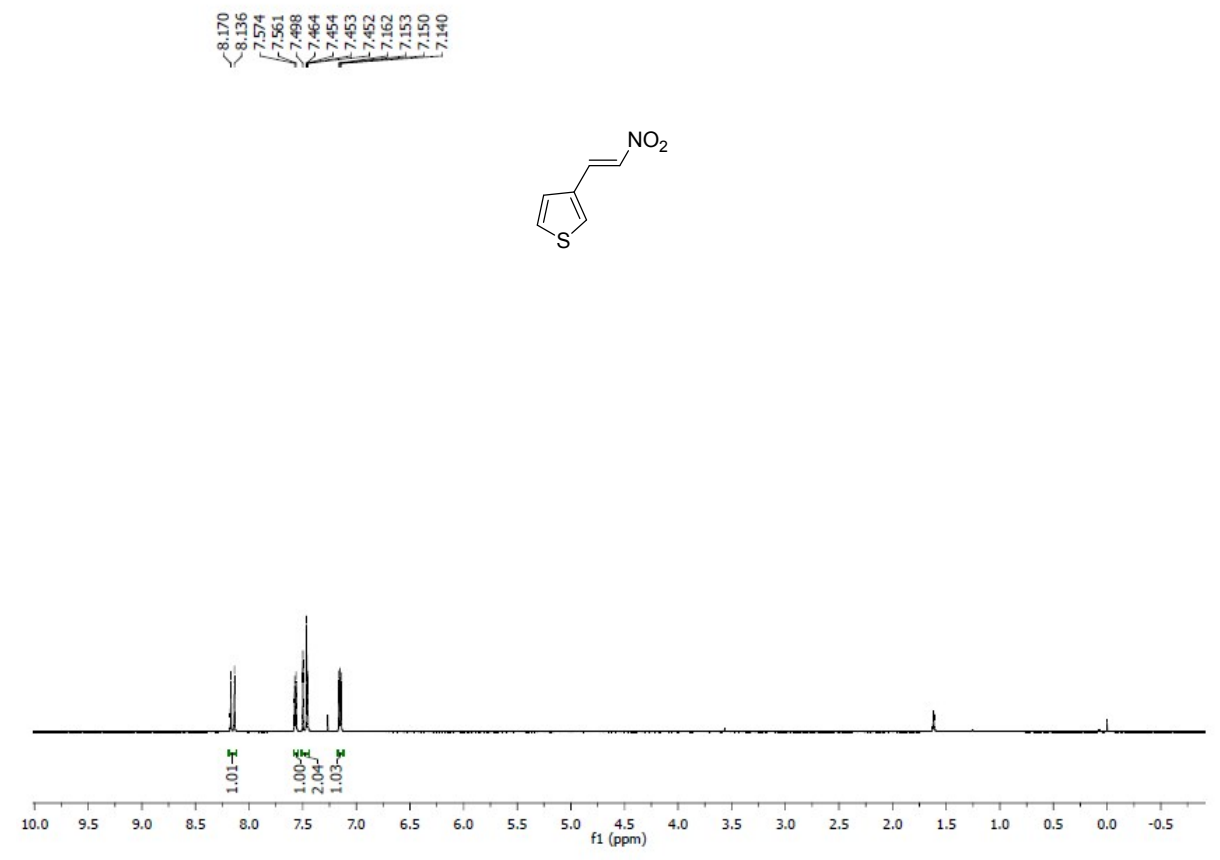

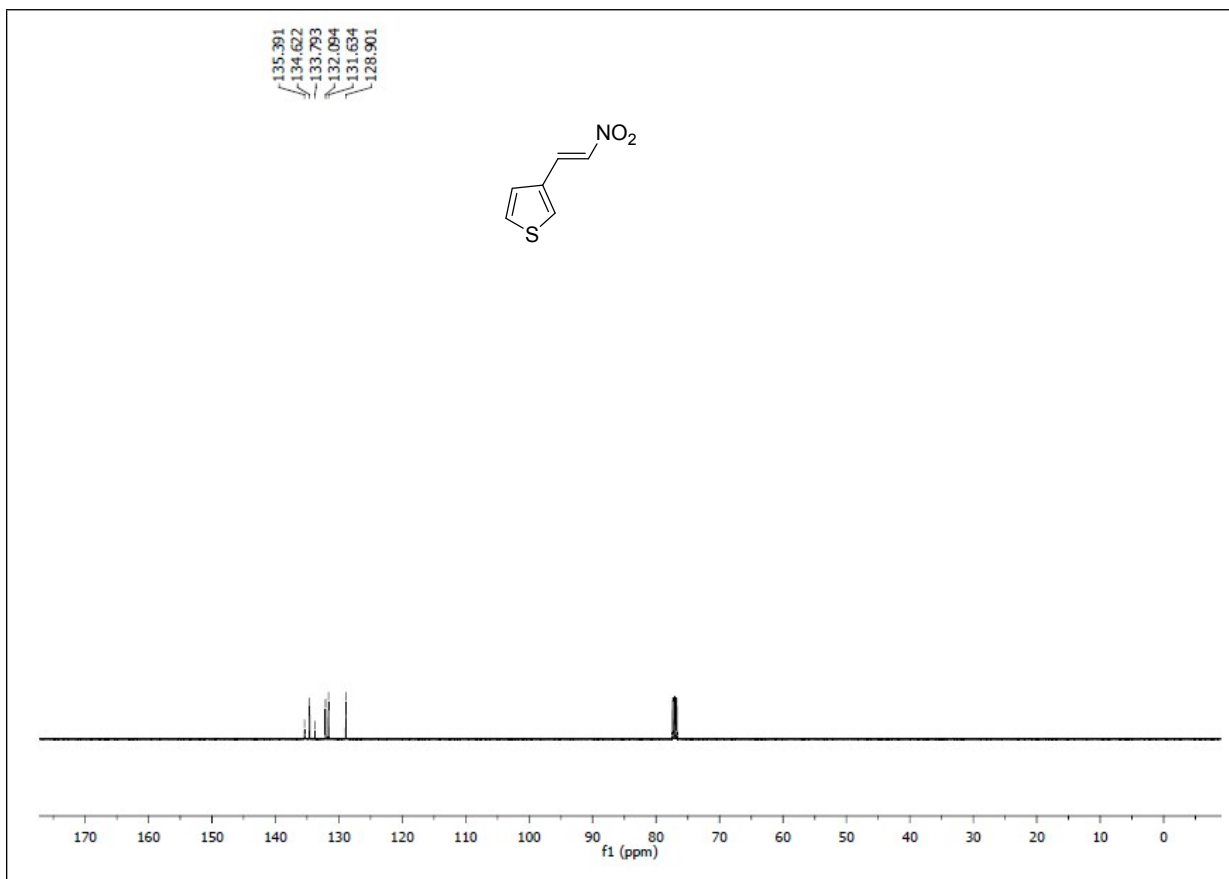

**<sup>1</sup>H and <sup>13</sup>C NMR Spectra of Compound (7x)**

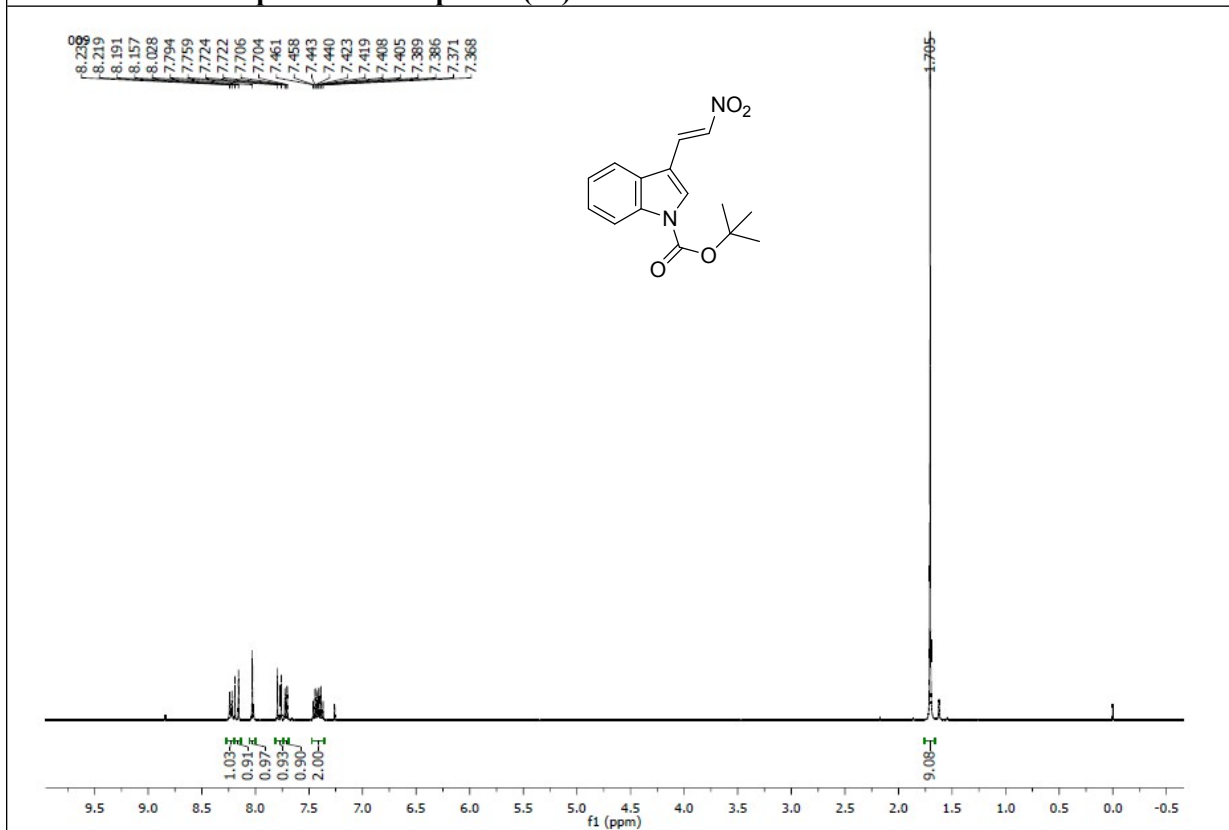

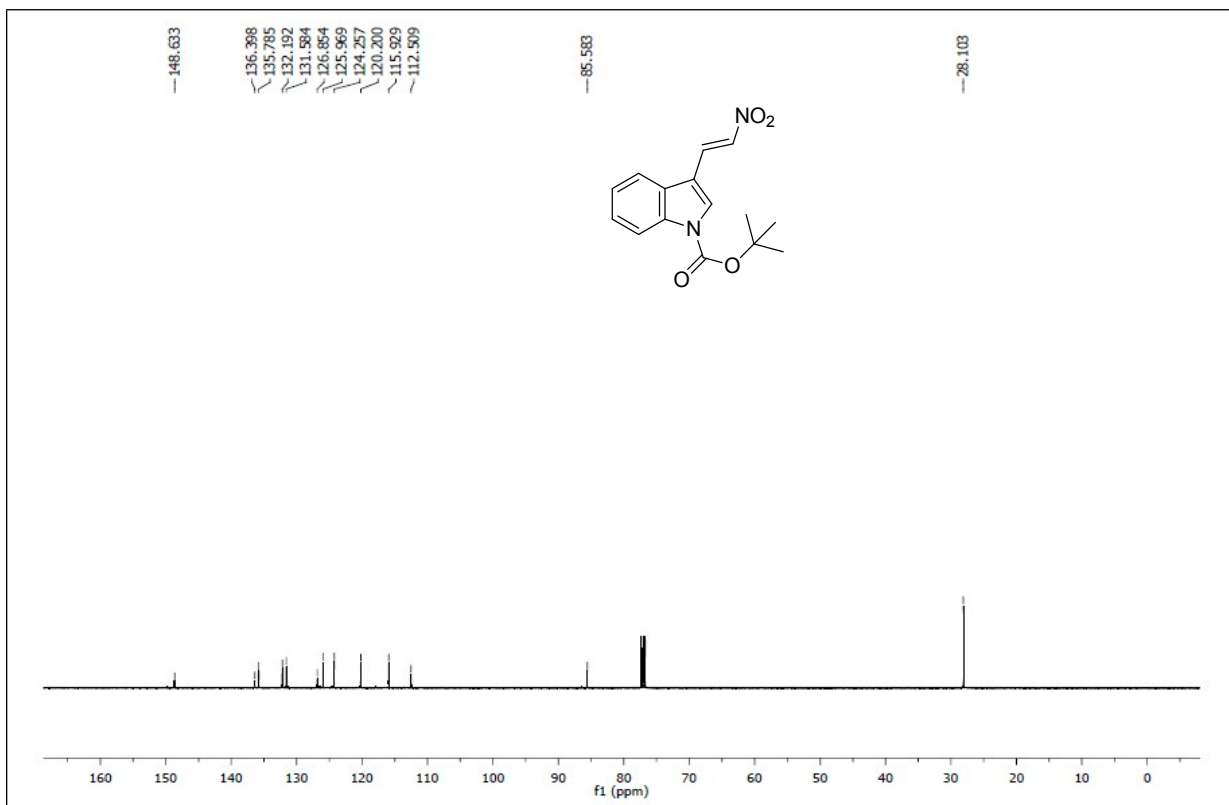

Supplement: c6ra06644e1.pdf [file c6ra06644e1.pdf]
